# Supplementary material
Source: Research Square preprint supplement (doi:10.21203/rs.3.rs-9481973/v1)
Supplement: Supplementary file 1 [file 2047dfcc48aebf190069e3a7.docx]

**Extended Fig.1 Matrix stiffening enhances radiosensitivity by promoting ferroptosis.**


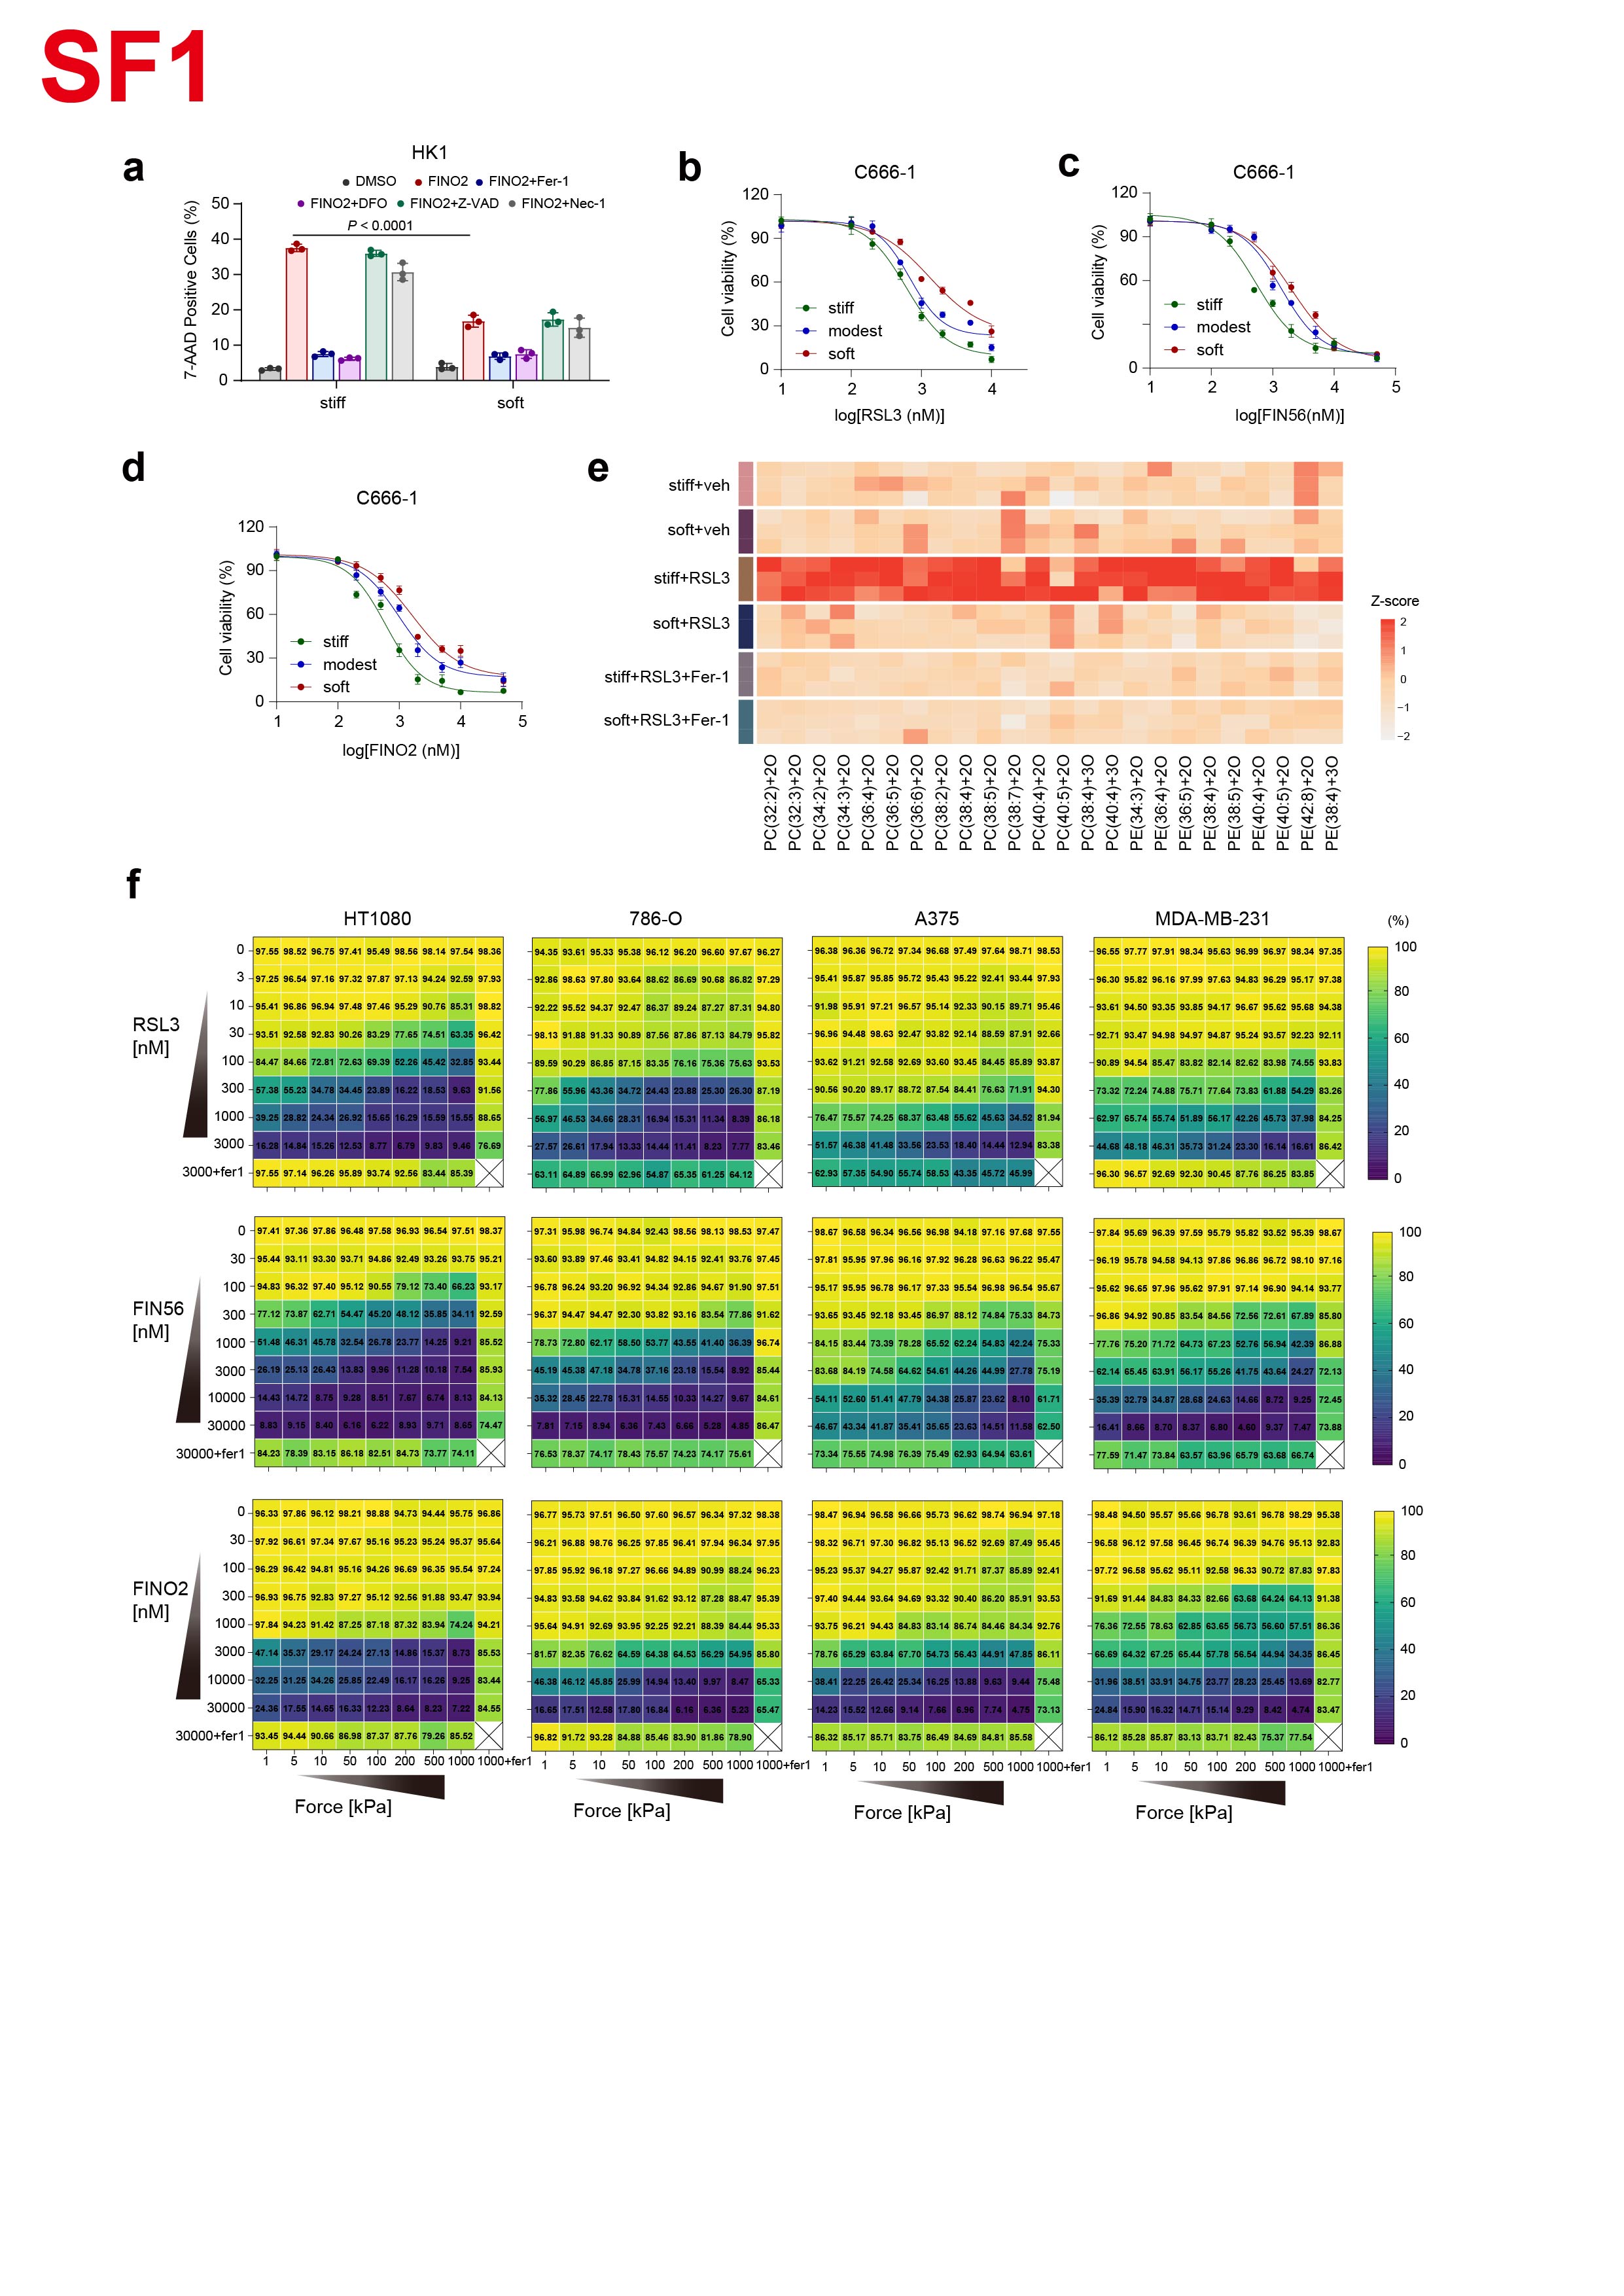


**a**, HK1 cells were cultured on stiff or soft matrices and pretreated with DMSO, Fer-1, DFO, Z-VAD-FMK or necrostatin-1 (Nec-1) before treatment with RSL3 or FIN56. The percentage of dead cells was measured.

**b-d**, Dose-dependent cell death induced by the ferroptosis inducers RSL3 **(b)**, FIN56 **(c)** or FINO2 **(d)** in C666-1 cells cultured on stiff, modest or soft matrices.

**e**, Heatmap showing LC-MS analysis of the relative changes in RSL3-induced oxygenated PC and PE molecular species in HK1 cells cultured on stiff or soft matrices, with or without Fer-1treatment. Row z-scores were calculated from the averaged abundance of each lipid species.

**f**, Percentage of dead cells in HT1080, 786-O, A375, and MDA-MB-231 under the indicated treatments. Ferroptosis was induced by RSL3, FIN56 or FINO2 at the indicated concentrations in cells cultured on matrices of different stiffness.

Data are shown as mean ± SD and are representative of at least three independent experiments, two-way ANOVA (a).

**Extended Fig.2 Matrix stiffness reshapes tumor cell lipid composition.**


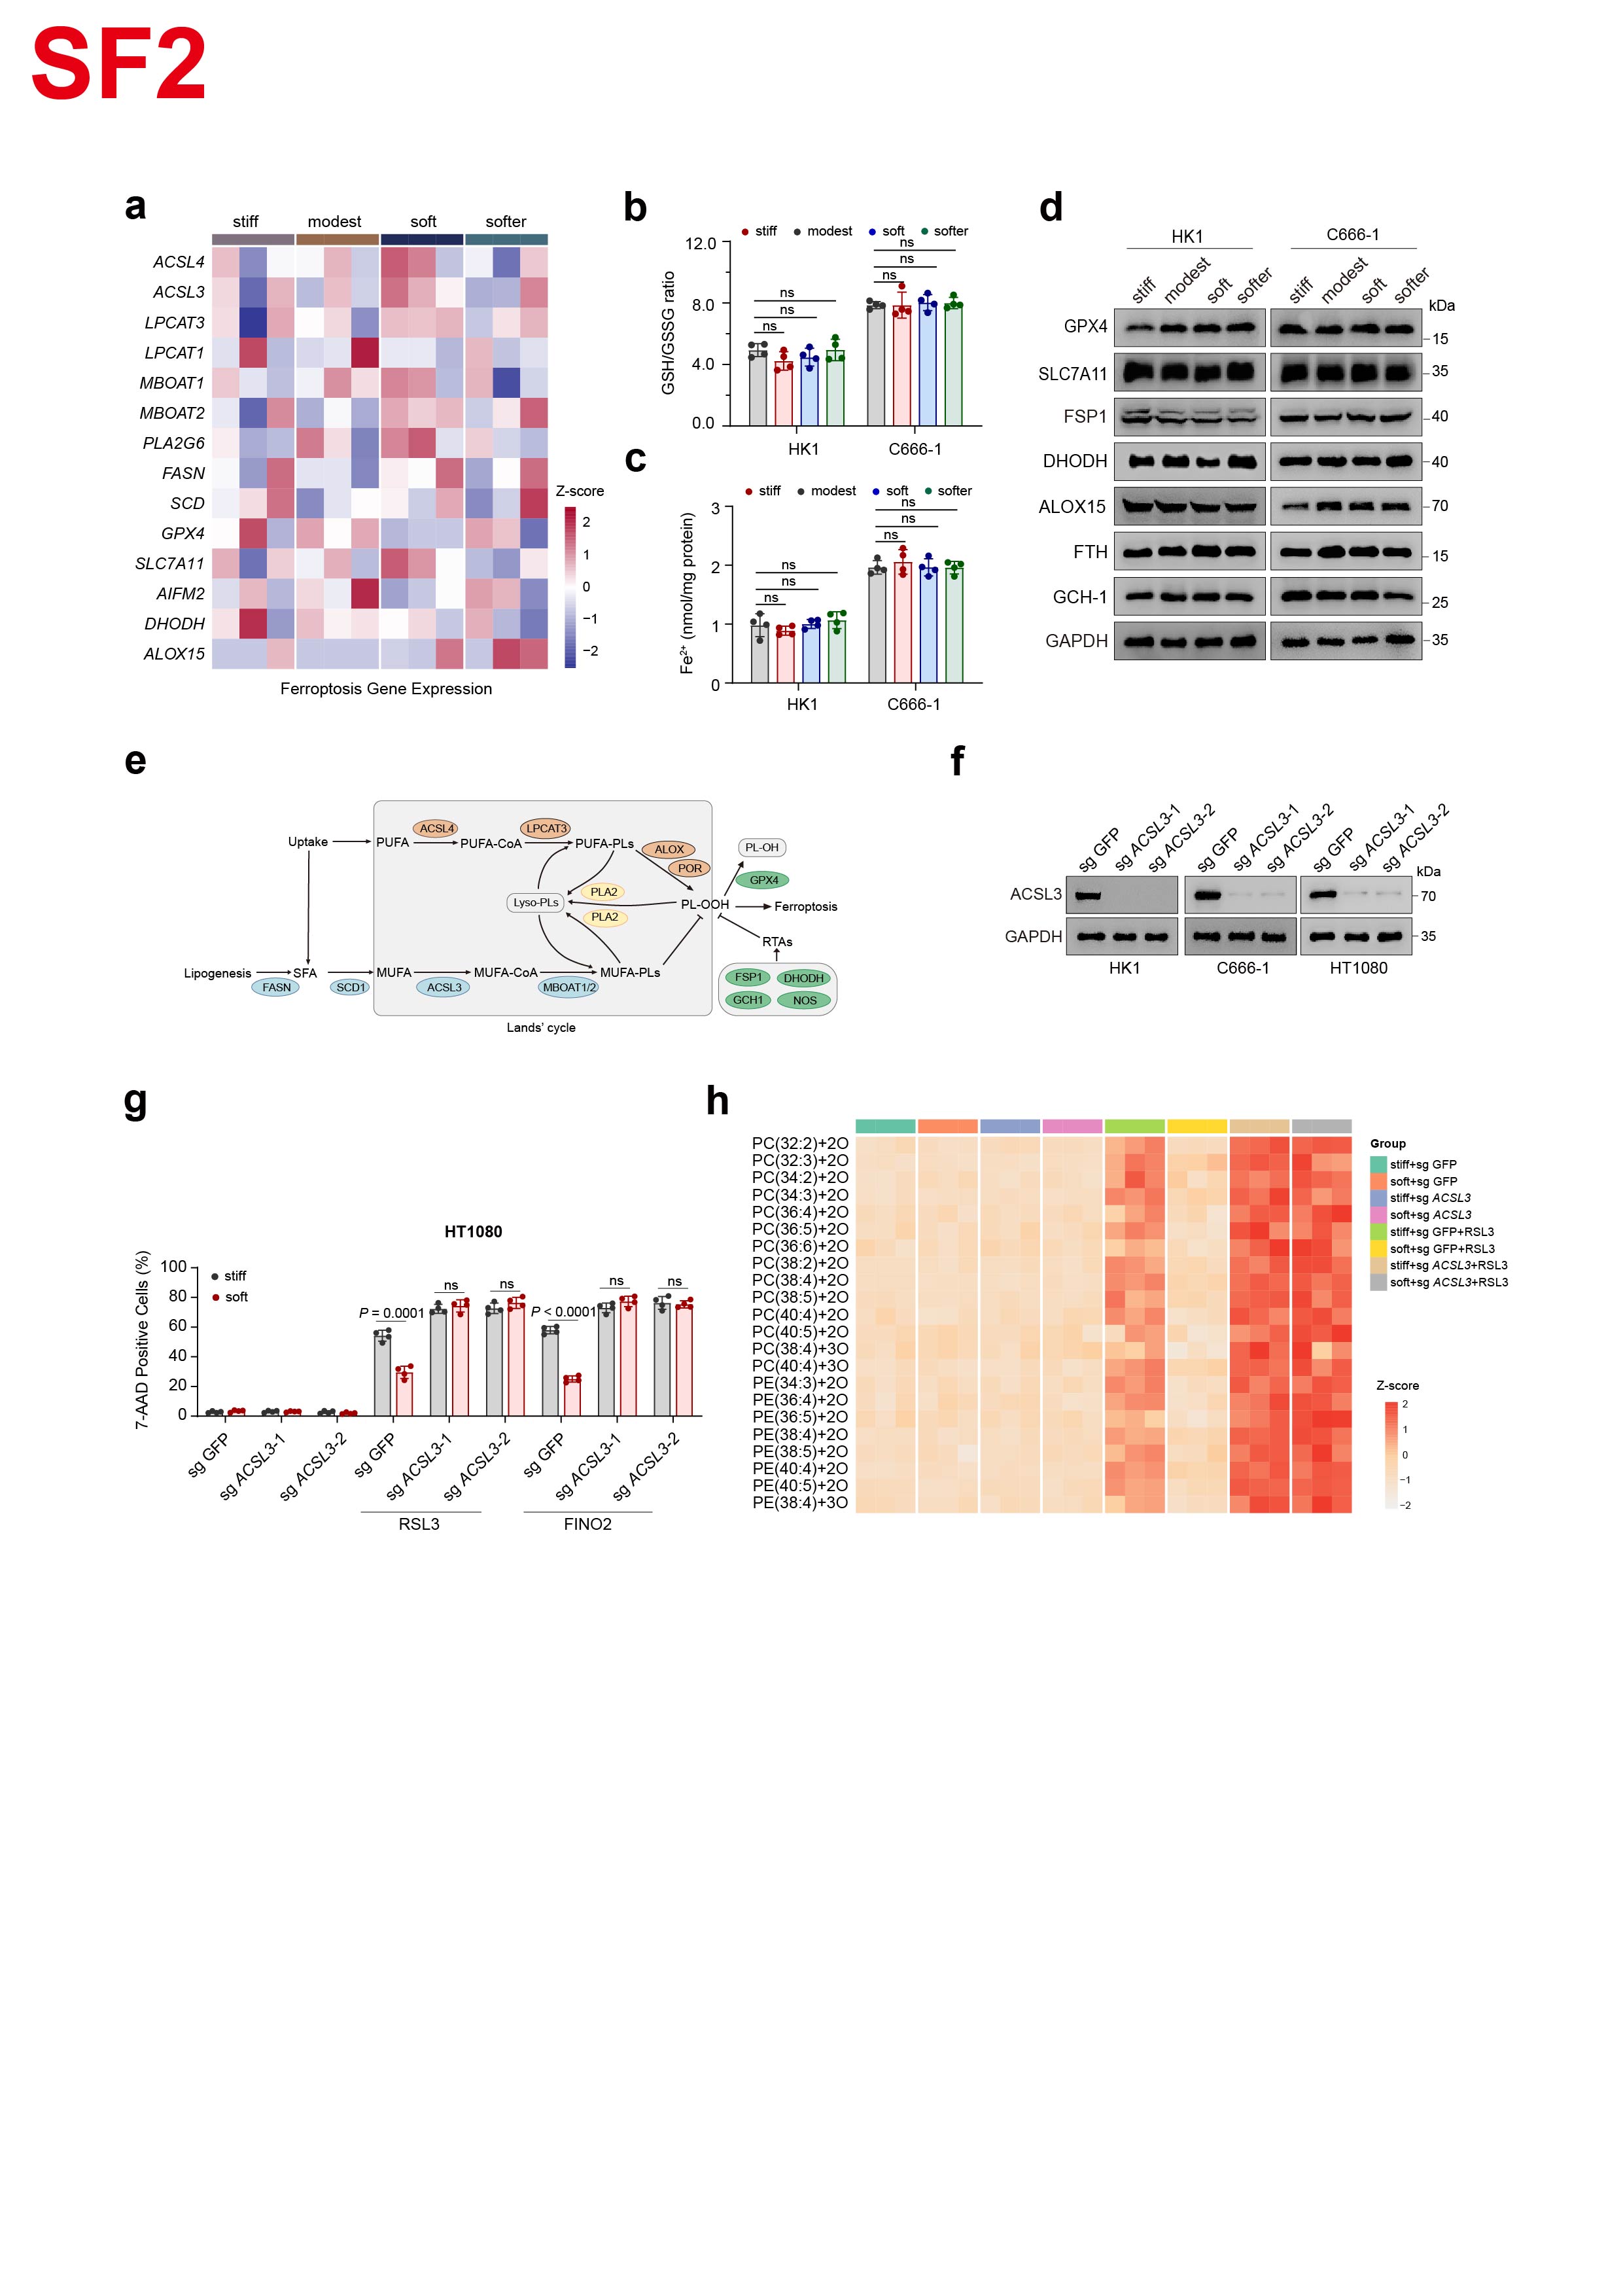


**a**, Heatmap showing the expression of ferroptosis-related genes in HK1 cells cultured on matrices of different stiffness. Row z-scores were calculated from the averaged expression of each gene.

**b**, GSH/GSSG ratios in HK1 cells cultured on matrices of different stiffness.

**c**, Cellular ferrous iron levels in HK1 cells cultured on matrices of different stiffness.

**d**, Immunoblots analysis of GPX4, SLC7A11, FSP1, DHODH, ALOX15, FTH and GCH1 in HK1 and C666-1 cells cultured on matrices of different stiffness.

**e**, Schematic illustration of the role of ACSL3 in ferroptosis and phospholipid remodeling.

**f**, Immunoblots analysis confirming *ACSL3* knockout efficiency in HK1, C666-1 and HT1080 cells.

**g**, *ACSL3*-knockout HT1080 cells and parental cells were cultured on stiff or soft matrices and treated with RSL3 or FINO2. The percentage of dead cells was measured.

**h**, Heatmap showing LC-MS analysis of the relative abundance of RSL3-induced oxygenated PC and PE molecular species in parental and *ACSL3*-knockout HK1 cells cultured on stiff or soft matrices. Row z-scores were calculated from the averaged abundance of each lipid species.

Data are shown as mean ± SD and are representative of at least three independent experiments, unpaired two-tailed *t*-test (g) or one-way ANOVA (b-c). ns, not significant.

**Extended Fig.3 MMF regulates MAMs formation and ferroptosis through ER sheet-to-tubule remodeling.**


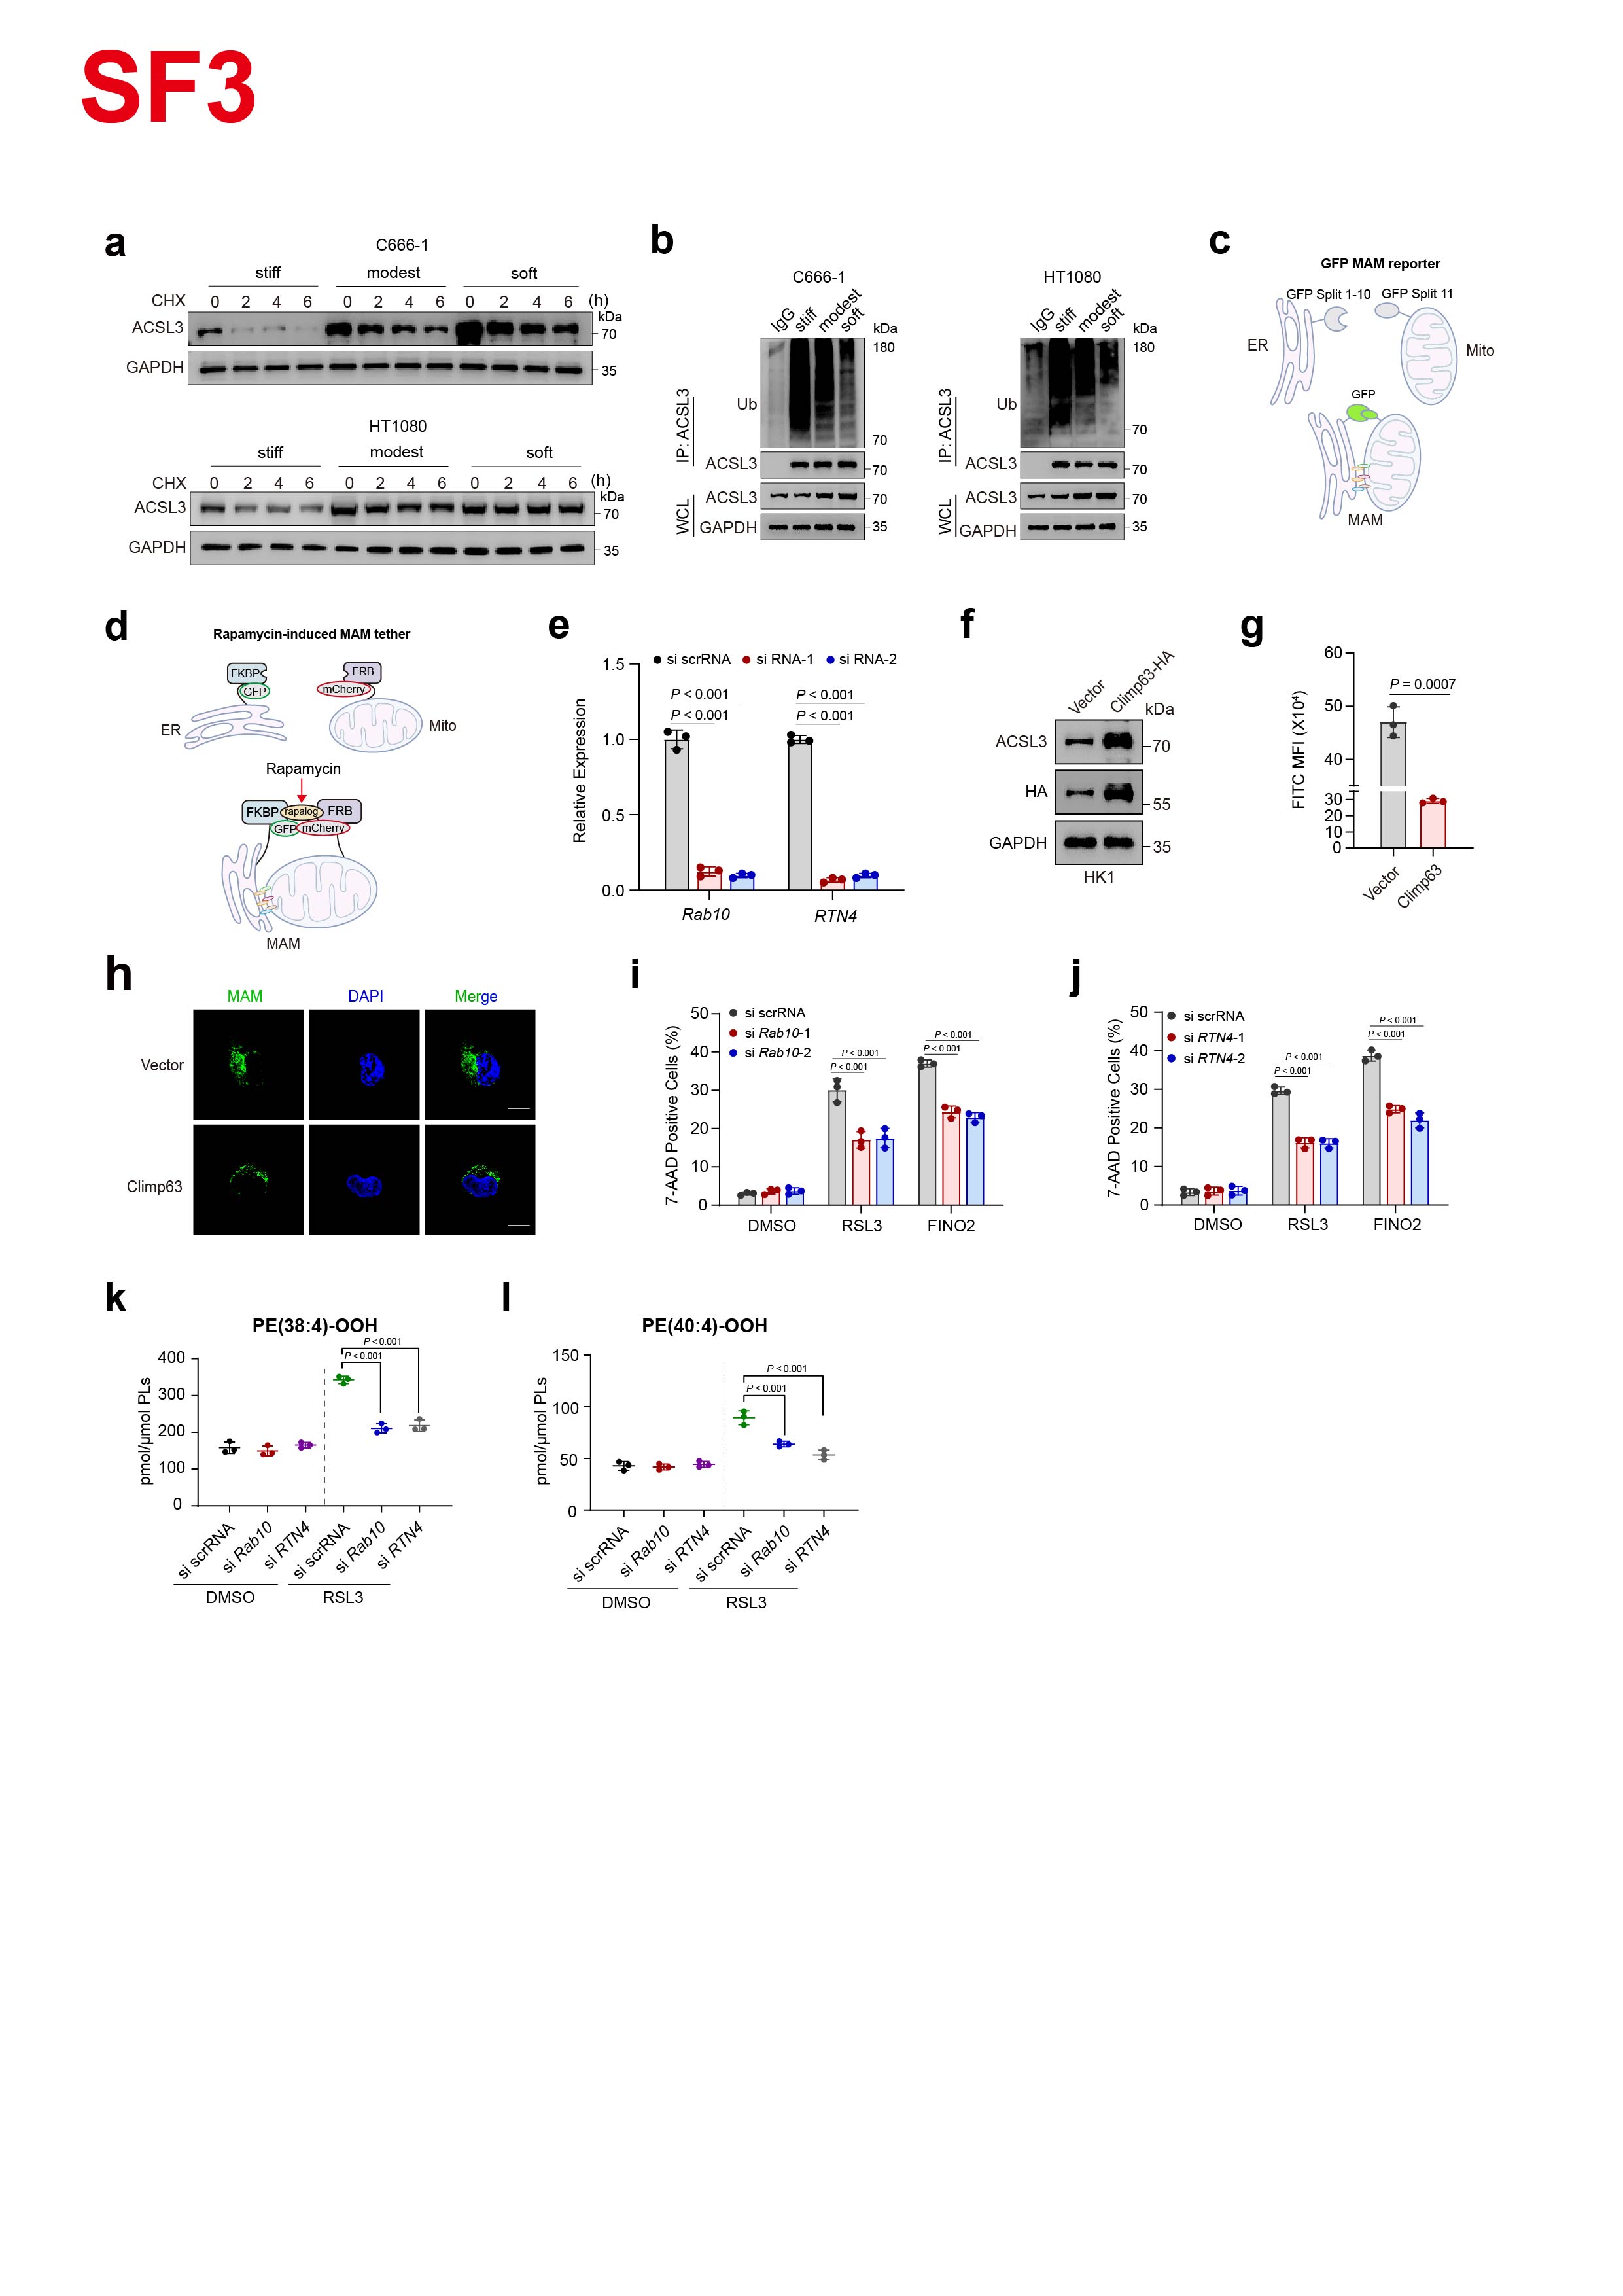


**a**, Immunoblots analysis of ACSL3 in C666-1 and HT1080 cells cultured on matrices of different stiffness and treated with CHX for the indicated times.

**b**, C666-1 and HT1080 cells cultured on soft or stiff matrices were subjected to immunoprecipitation with anti-ACSL3 antibody, followed by immunoblotting with anti-Ub antibody.

**c**, Schematic illustration of the MAM reporter, in which GFP fluorescence is generated upon ER-mitochondria contact formation.

**d**, Schematic illustration of rapamycin-induced MAMs tethering through FKBP-FRB interaction in chemically inducible MAMs-forming cells.

**e**, RT-qPCR analysis of *Rab10* and *RTN4* mRNA expression following the indicated siRNA-mediated silencing.

**f**, Immunoblots analysis of ACSL3 and climp63 in CLIMP63-HA overexpressing HK1 cells.

**g**, Flow-cytometric quantification of the GFP-MAM reporter in CLIMP63-HA overexpressing HK1 cells and parental cells.

**h**, Immunofluorescence images of GFP-MAMs signal in CLIMP63-HA overexpressing HK1 cells and parental cells. Scale bar, 10 μm.

**i-j**, HK1 cells were subjected to *Rab10*, or *RTN4* silencing before treatment with RSL3 or FINO2. The percentage of dead cells was measured.

**k-l**, HK1 cells treated with DMSO or RSL3, with or without prior silencing of *Rab10* or *RTN4*. The levels of ferroptosis-associated phospholipid species, including PE (38:4)-OOH and PE (40:4)-OOH, was measured.

Data are shown as mean ± SD and are representative of at least three independent experiments, unpaired two-tailed *t*-test (g) or one-way ANOVA (e, i-l).

**Extended Fig.4 Microtubule acetylation regulates MAMs formation and ferroptosis.**


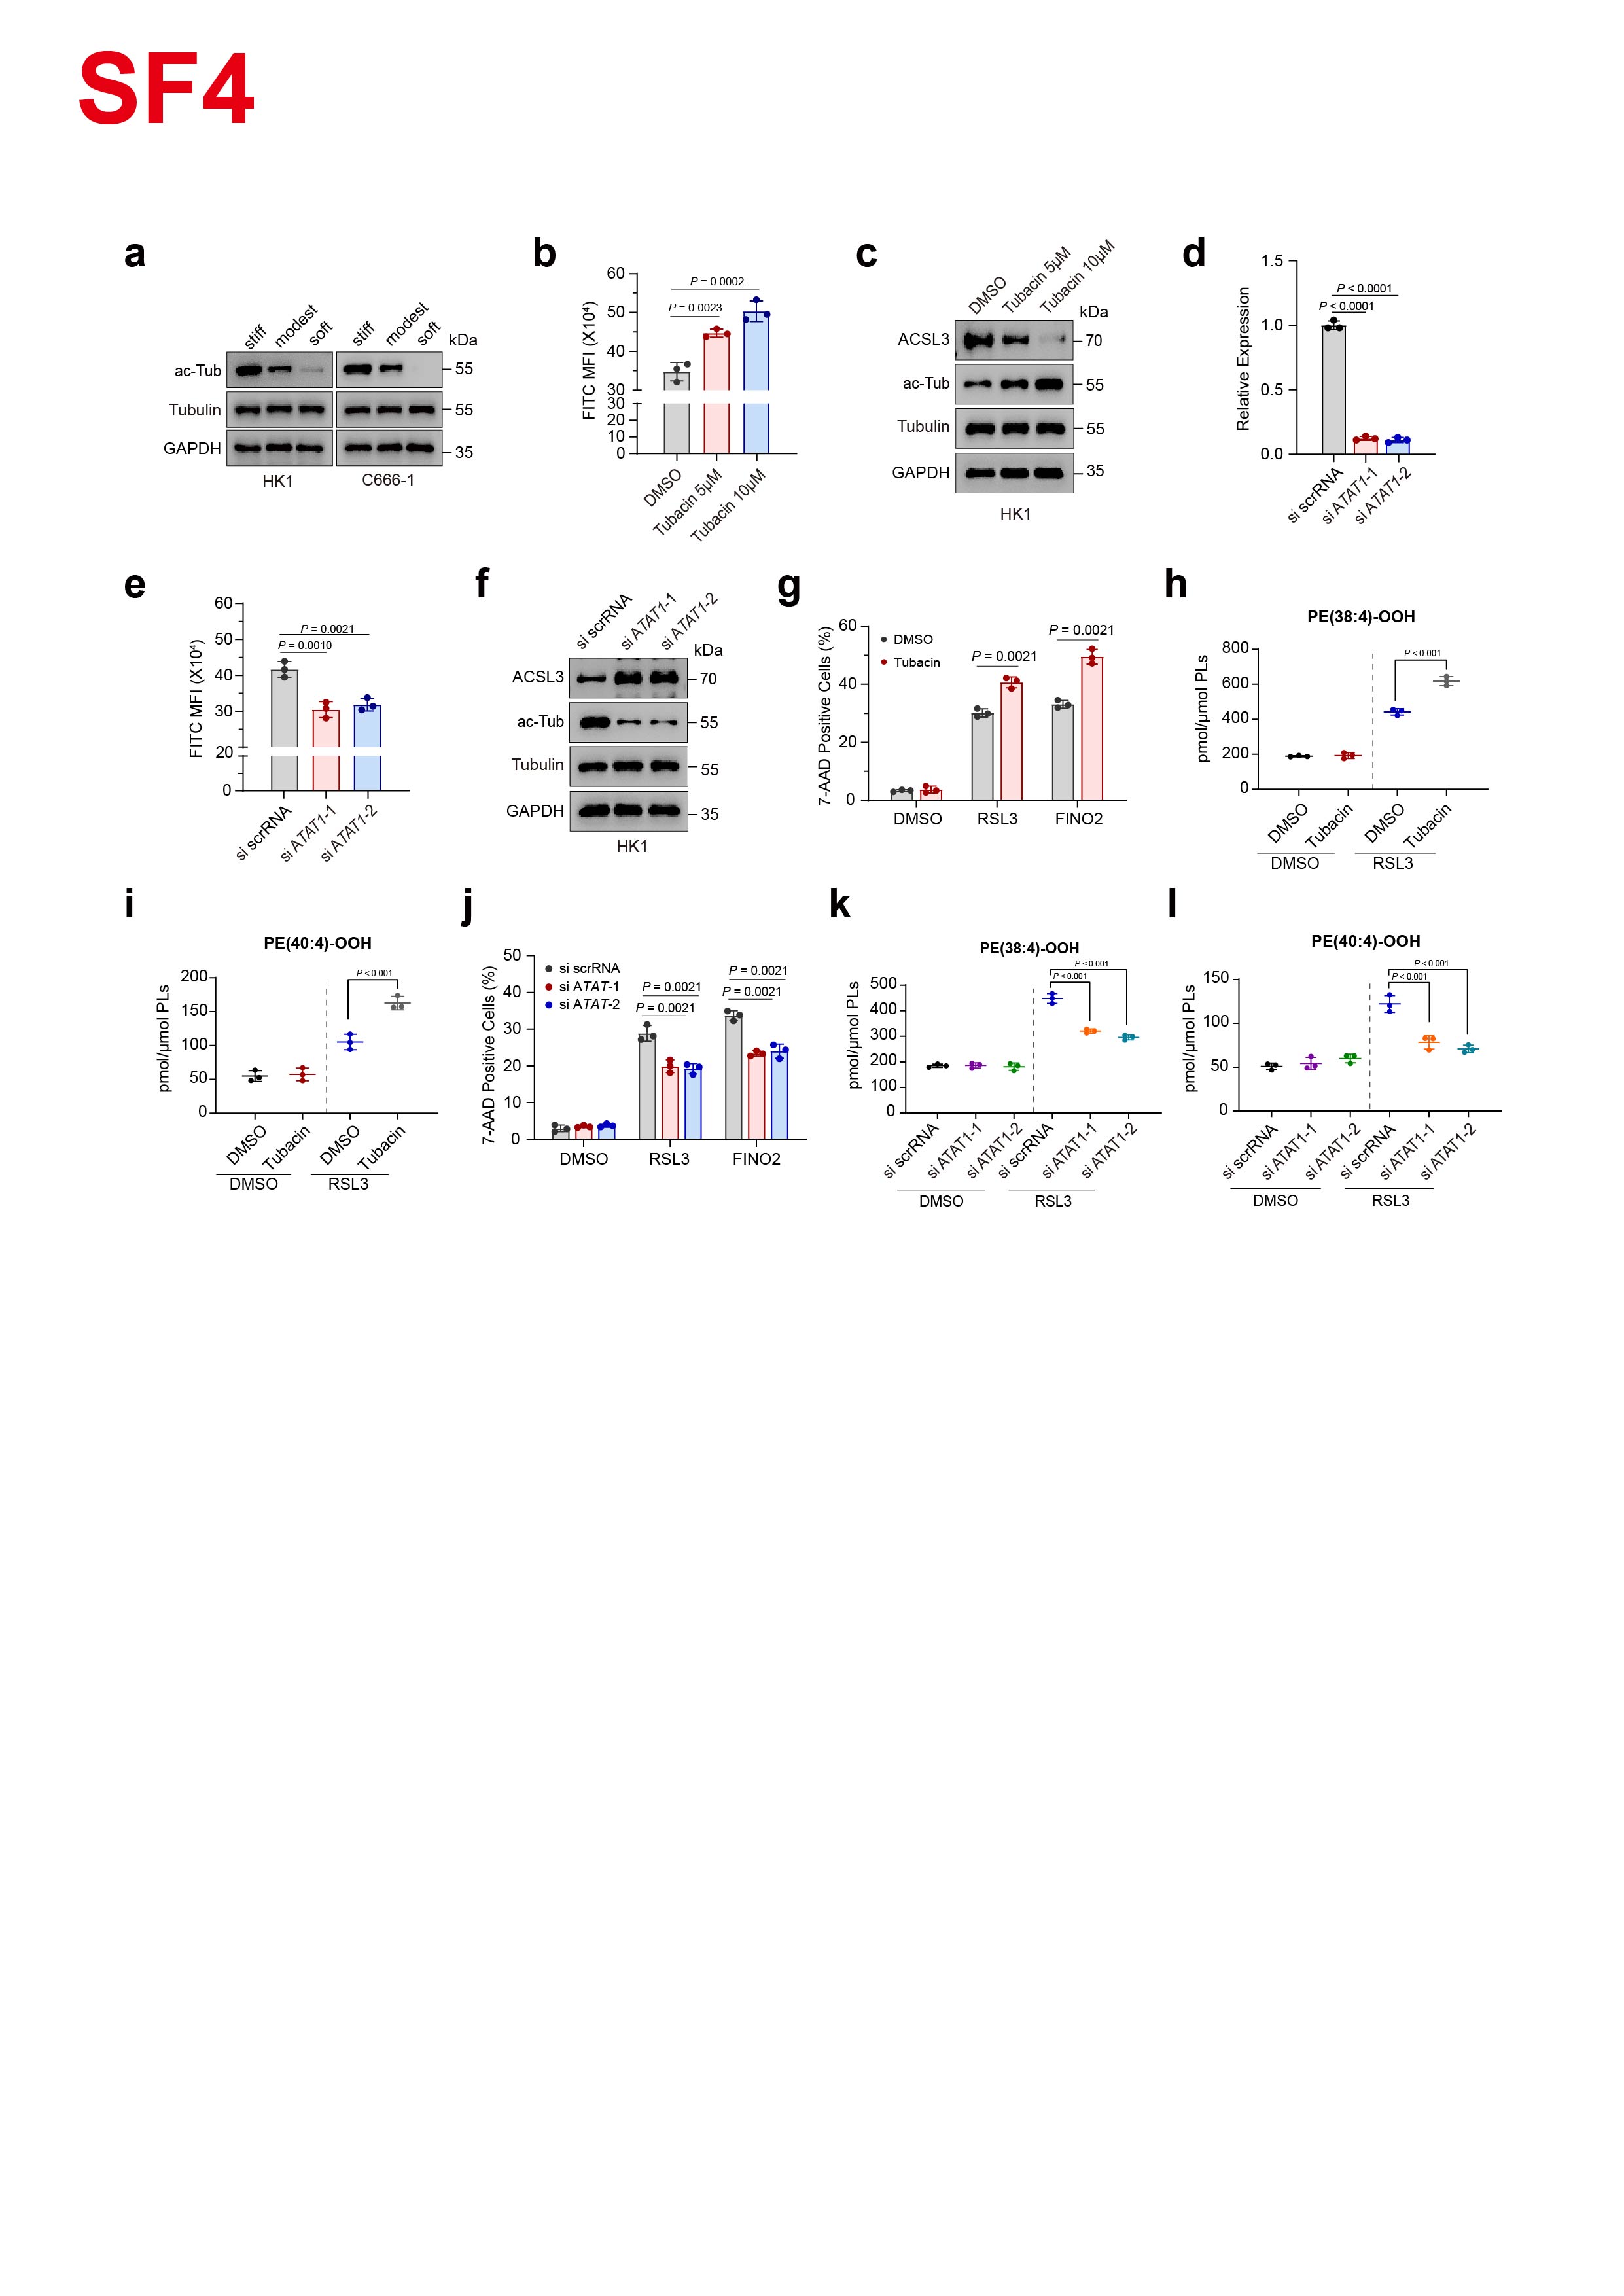


**a**, Immunoblots analysis of tubulin and acetylated tubulin in HK1 and C666-1 cells cultured on matrices of different stiffness.

**b**, Flow-cytometric quantification of the GFP-MAM reporter in HK1 cells treated with DMSO or tubacin.

**c**, Immunoblot analysis of tubulin, acetylated tubulin and ACSL3 in HK1 cells treated with DMSO or tubacin.

**d**, RT-qPCR analysis of *ATAT1* mRNA expression following the indicated siRNA-mediated silencing.

**e**, Flow-cytometric quantification of the GFP-MAM reporter in HK1 cells subjected to *ATAT1* silencing.

**f**, Immunoblot analysis of tubulin, acetylated tubulin and ACSL3 in HK1 cells cultured on stiff matrices following *ATAT1* silencing.

**g**, HK1 cells were pretreated with vehicle or tubacin before exposure to RSL3 or FINO2. The percentage of dead cells was measured.

**h-i**, Levels of the ferroptosis-associated phospholipid species PE (38:4)-OOH **(h)** and PE (40:4)-OOH **(i)** in HK1 cells treated with DMSO or RSL3, with or without prior tubacin treatment.

**j**, HK1 cells were subjected to *ATAT1* silencing before exposure to RSL3 or FINO2. The percentage of dead cells was measured.

**k-l**, Levels of the ferroptosis-associated phospholipid species PE (38:4)-OOH **(k)** and PE (40:4)-OOH **(l)** in HK1 cells treated with DMSO or RSL3, with or without prior *ATAT1* silencing.

Data are shown as mean ± SD and are representative of at least three independent experiments, unpaired two-tailed *t*-test (g) or one-way ANOVA (b, d-e, h-l).

**Extended Fig.5 Mitochondrial succinate accumulation regulates ferroptosis by promoting ACSL3 degradation.**


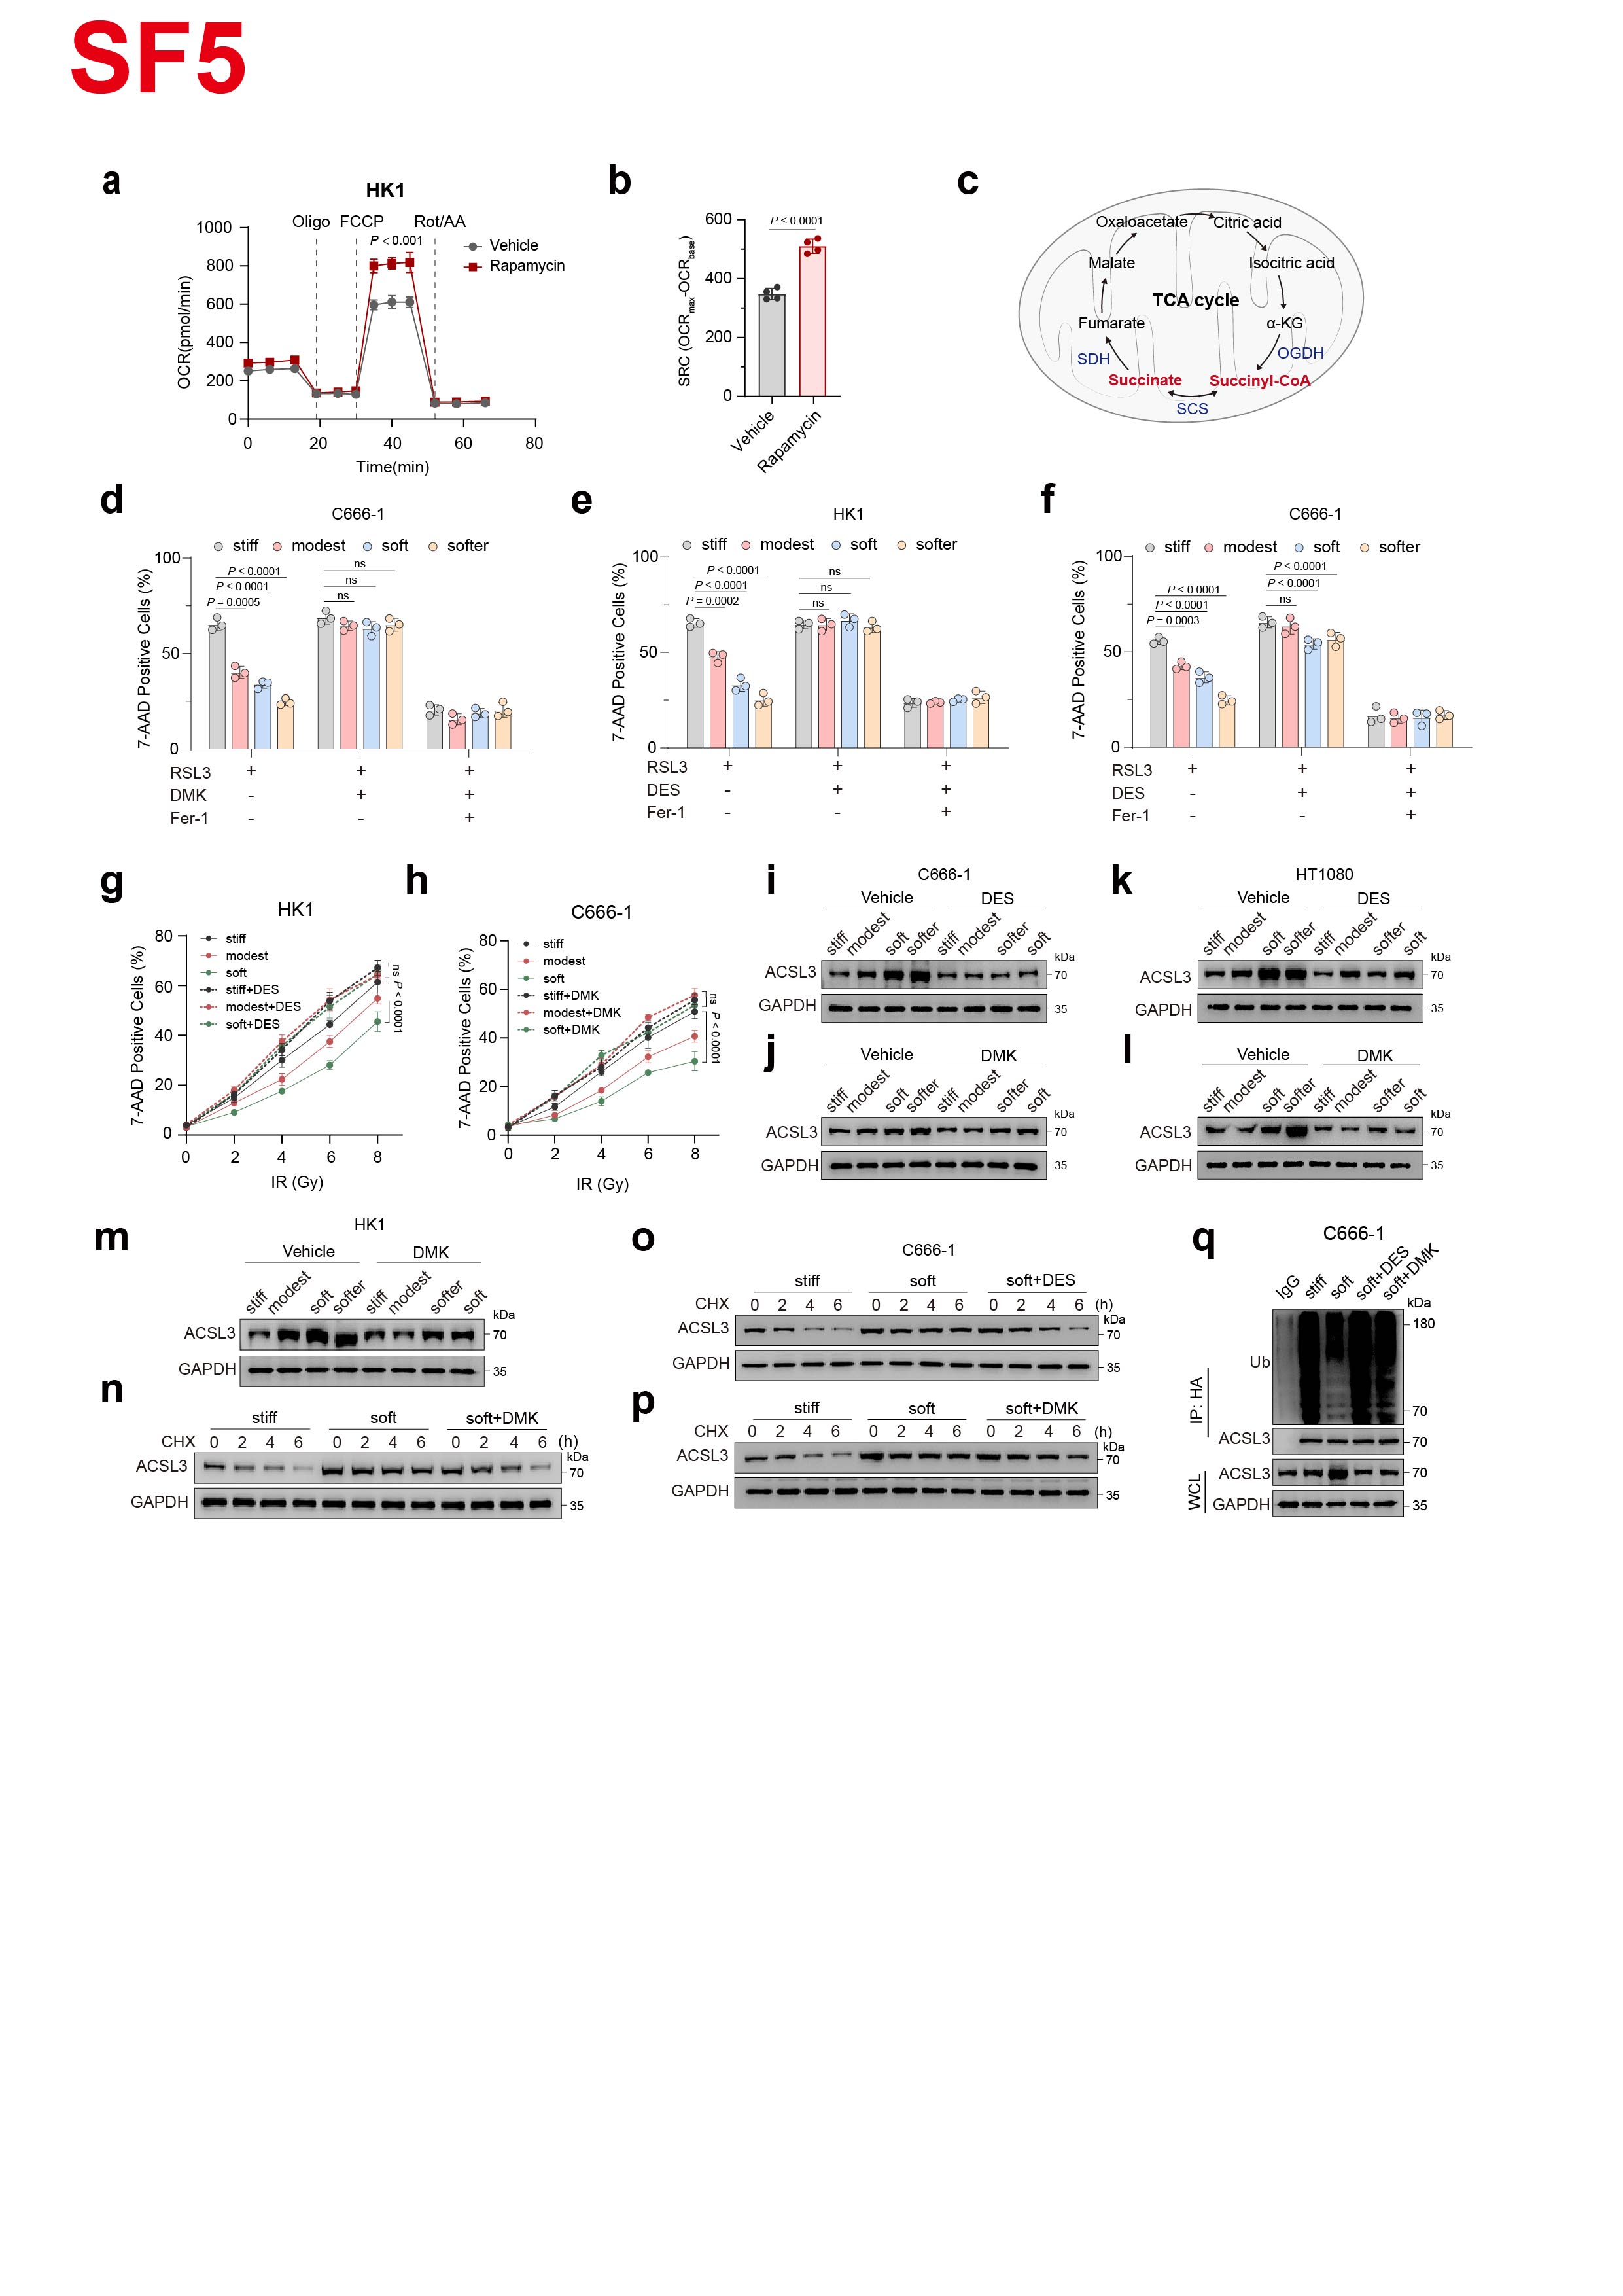


**a**, Oxygen consumption rate (OCR) of HK1 cells treated with vehicle or rapamycin. Oligo (oligomycin), FCCP and Rot/AA (rotenone and antimycin A) were used to determine the basal respiration, ATP-coupled respiration, maximal respiratory capacity and non-mitochondrial oxygen consumption. n = 4.

**b**, Spare respiratory capacity (SRC) of HK1 cells treated with vehicle or rapamycin.

**c**, Schematic illustration of the tricarboxylic acid (TCA) cycle.

**d**, C666-1 cells were cultured on matrices of different stiffness and treated with RSL3 alone, RSL3 plus DMK, or RSL3 plus DMK and Fer-1. The percentage of dead cells was measured.

**e-f**, HK1 cells **(e)** or C666-1 cells **(f)** were cultured on matrices of different stiffness and treated with RSL3 alone, RSL3 plus DES, or RSL3 plus DES and Fer-1. The percentage of dead cells was measured.

**g-h**, HK1 cells **(g)** or C666-1 cells **(h)** were cultured on matrices of different stiffness, treated with or without DES, and exposed to the indicated doses of irradiation. The percentage of dead cells was measured.

**i-j**, Immunoblots analysis of ACSL3 in C666-1 cells cultured on matrices of different stiffness and treated with DES **(i)**, DMK **(j)** or vehicle.

**k-l**, Immunoblots analysis of ACSL3 in HT1080 cells cultured on matrices of different stiffness and treated with DES **(k)**, DMK **(l)** or vehicle.

**m**, Immunoblots analysis of ACSL3 in HK1 cells cultured on matrices of different stiffness and treated with DMK or vehicle.

**n**, Immunoblots analysis of ACSL3 in HK1 cells cultured on stiff or soft matrices, with or without DMK supplementation, and treated with CHX for the indicated times.

**o-p**, Immunoblots analysis of ACSL3 in C666-1 cells cultured on stiff or soft matrices, with or without DES **(o)** or DMK **(p)**, and treated with CHX for the indicated times.

**q**, Cell lysates from HA-ACSL3-WT-overexpressing C666-1 cells cultured on stiff or soft matrices, with or without DES or DMK supplementation, were subjected to immunoprecipitation with anti-HA antibody, followed by immunoblotting with anti-Ub antibody.

Data are shown as mean ± SD and are representative of at least three independent experiments, unpaired two-tailed *t*-test (a-b), one-way ANOVA (d-f) or two-way ANOVA (g-h).

**Extended Fig.6 MMF regulates mitochondrial succinate metabolism by impairing SDH activity.**


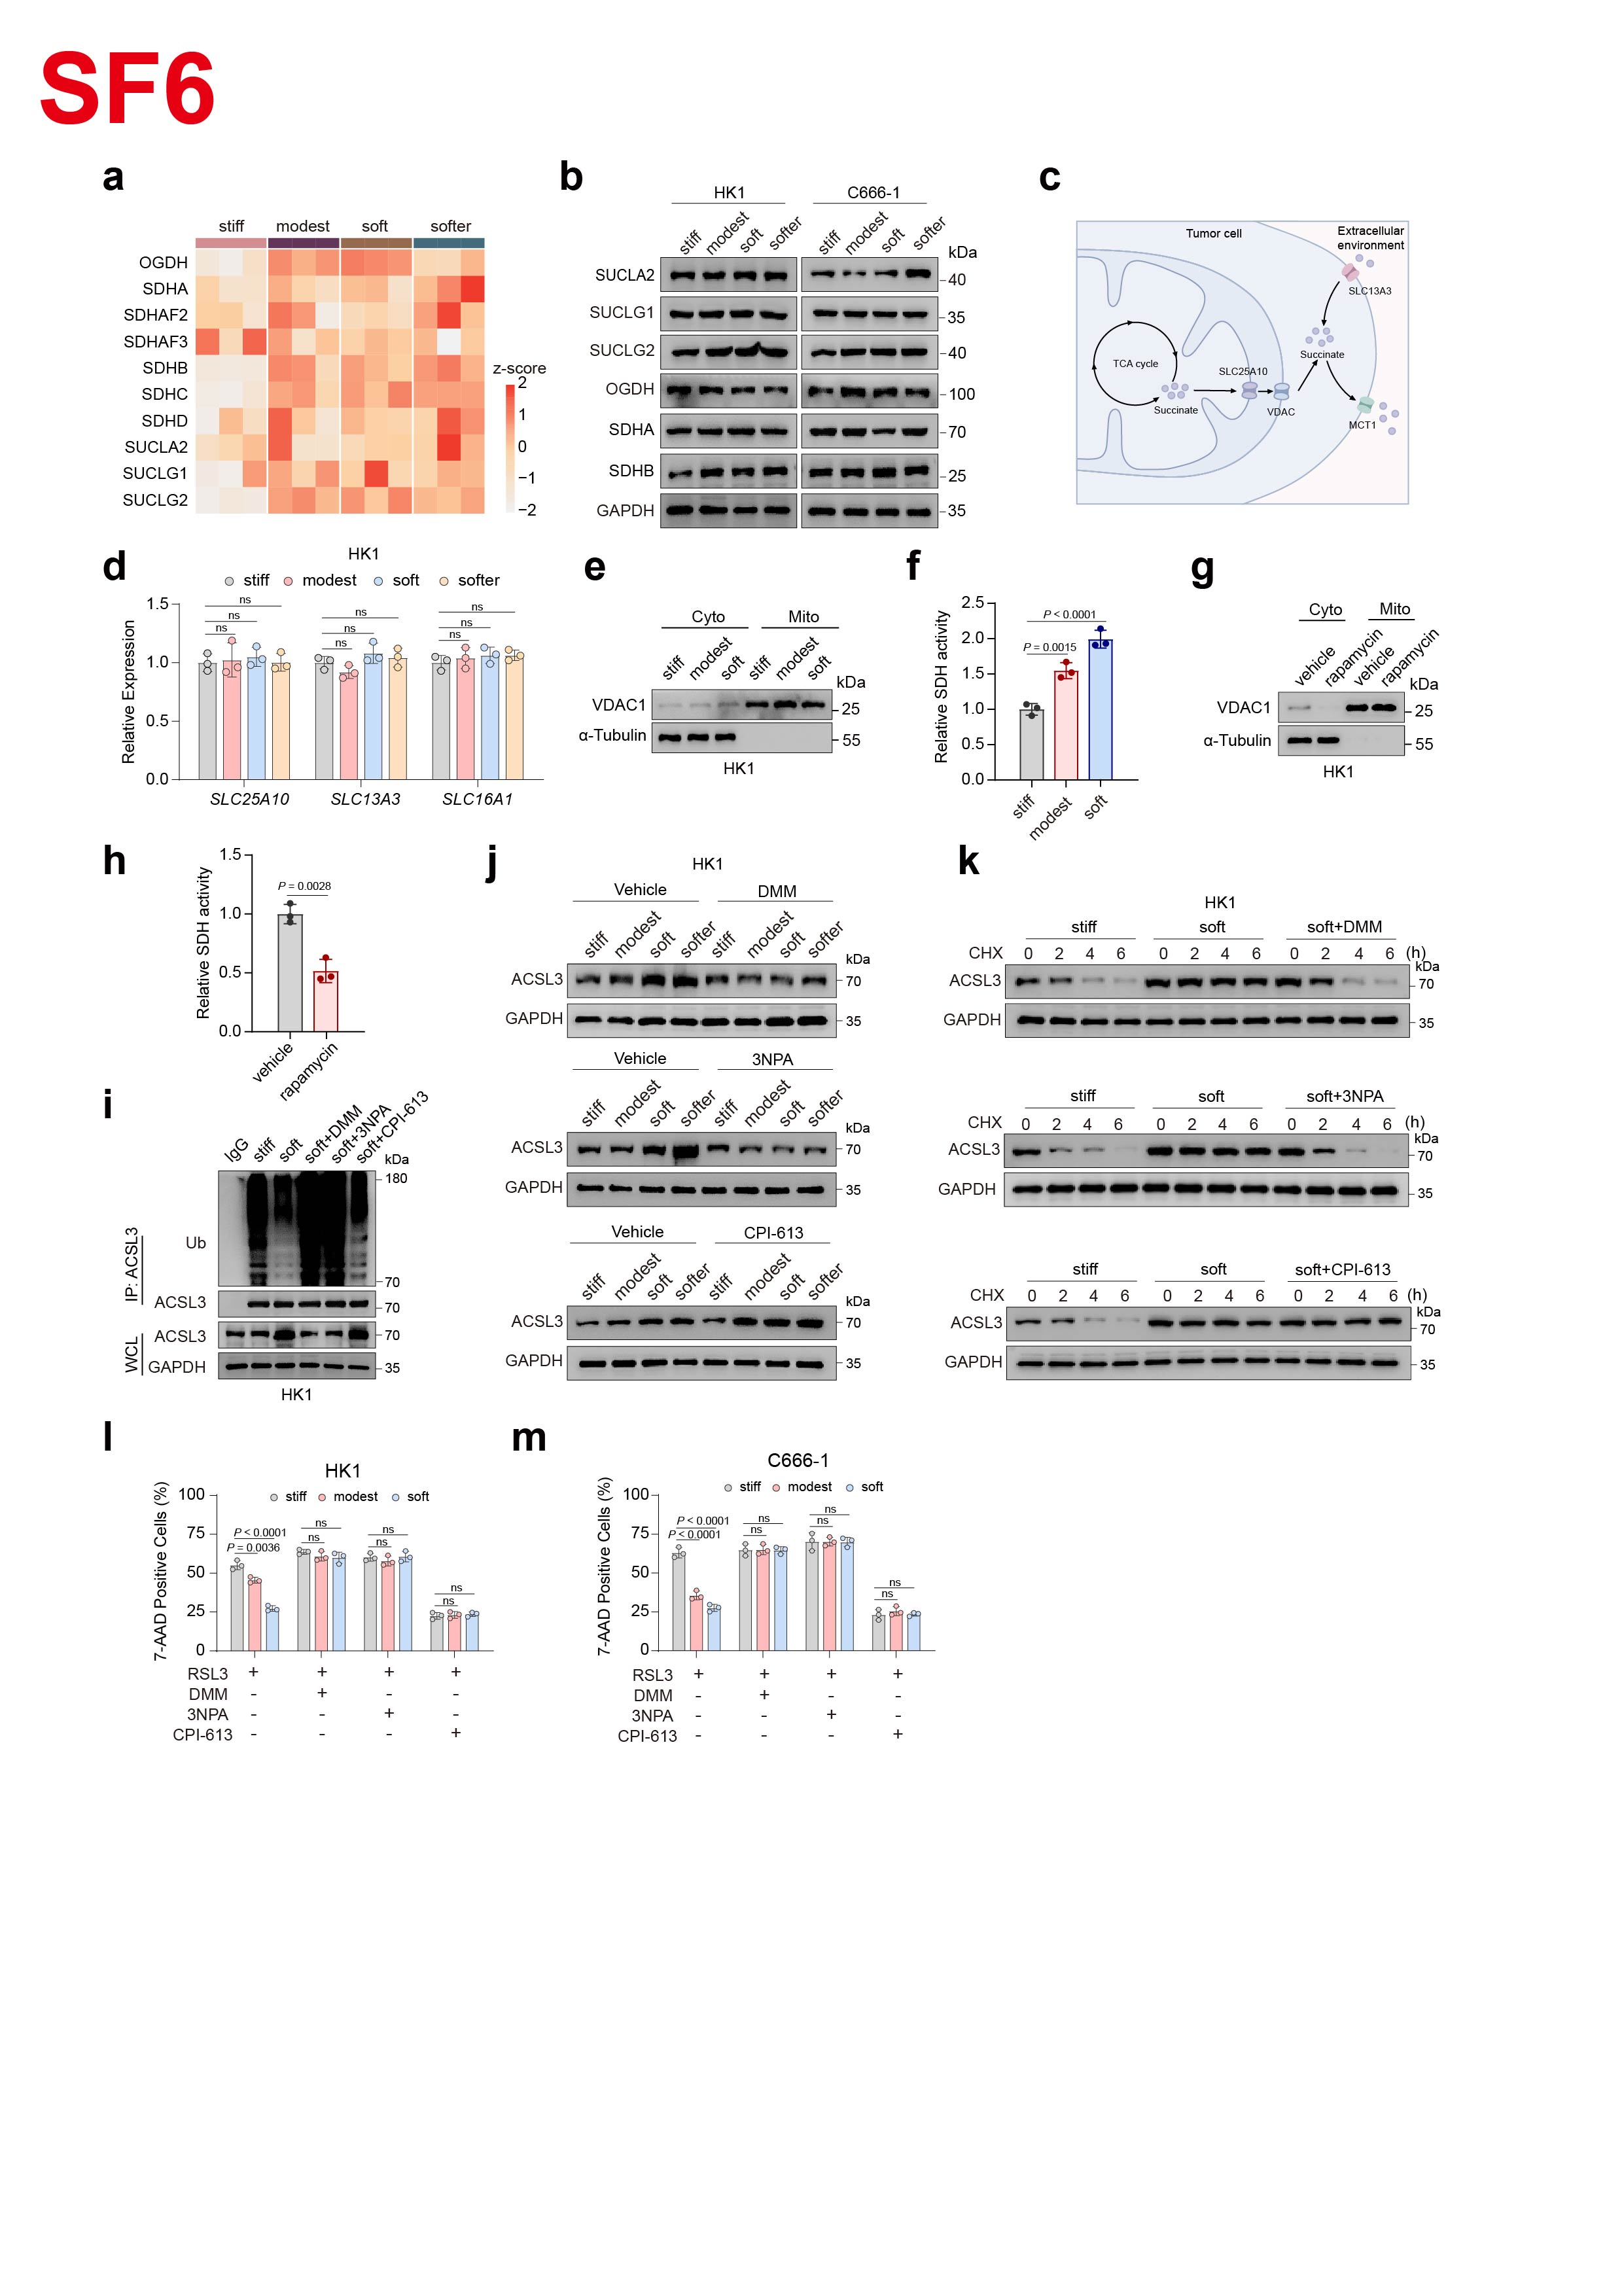


**a**, Proteomic profiling of succinate-associated metabolic enzymes in HK1 cells cultured on matrices of different stiffness. Row z-scores were calculated from the averaged abundance of each protein.

**b**, Immunoblot analysis of succinate-associated metabolic enzymes in HK1 and C666-1 cells cultured on matrices of different stiffness.

**c**, Schematic illustration of cellular succinate metabolism.

**d**, RT-qPCR analysis of *SLC25A10*, *SLC13A3* and *SLC16A1* (encoding MCT1 protein) mRNA expression in HK1 cells cultured on matrices of different stiffness.

**e**, Immunoblot analysis of VDAC1 in mitochondrial and cytoplasmic fractions from HK1 cells cultured on matrices of different stiffness.

**f**, Relative SDH activity in HK1 cells cultured on matrices of different stiffness.

**g**, Immunoblot analysis of VDAC1 in mitochondrial and cytoplasmic fractions from HK1 cells treated with vehicle or rapamycin.

**h**, Relative SDH activity in HK1 cells treated with vehicle or rapamycin.

**i**, Cell lysates from HK1 cells cultured on stiff or soft matrices, with or without DMM, 3-NPA or CPI-613 supplementation, were subjected to immunoprecipitation with anti-ACSL3 antibody, followed by immunoblotting with anti-Ub antibody.

**j**, Immunoblot analysis of ACSL3 in HK1 cells cultured on matrices of different stiffness and treated with DMM, 3-NPA, CPI-613 or vehicle.

**k**, Immunoblot analysis of ACSL3 in HK1 cells cultured on stiff or soft matrices, with or without DMM, 3-NPA or CPI-613, and treated with CHX for the indicated times.

**l-m**, HK1 cells **(l)** or C666-1 cells **(m)** were cultured on matrices of different stiffness and treated with RSL3 alone, RSL3 plus DMM, RSL3 plus 3-NPA, or RSL3 plus CPI-613.The percentage of dead cells was measured.

Data are shown as mean ± SD and are representative of at least three independent experiments, unpaired two-tailed *t*-test (h) or one-way ANOVA (d, f, l-m). ns, not significant.

**Extended Fig.7 ACSL3 K422 succinylation promotes its degradation and mediates ferroptosis resistance.**


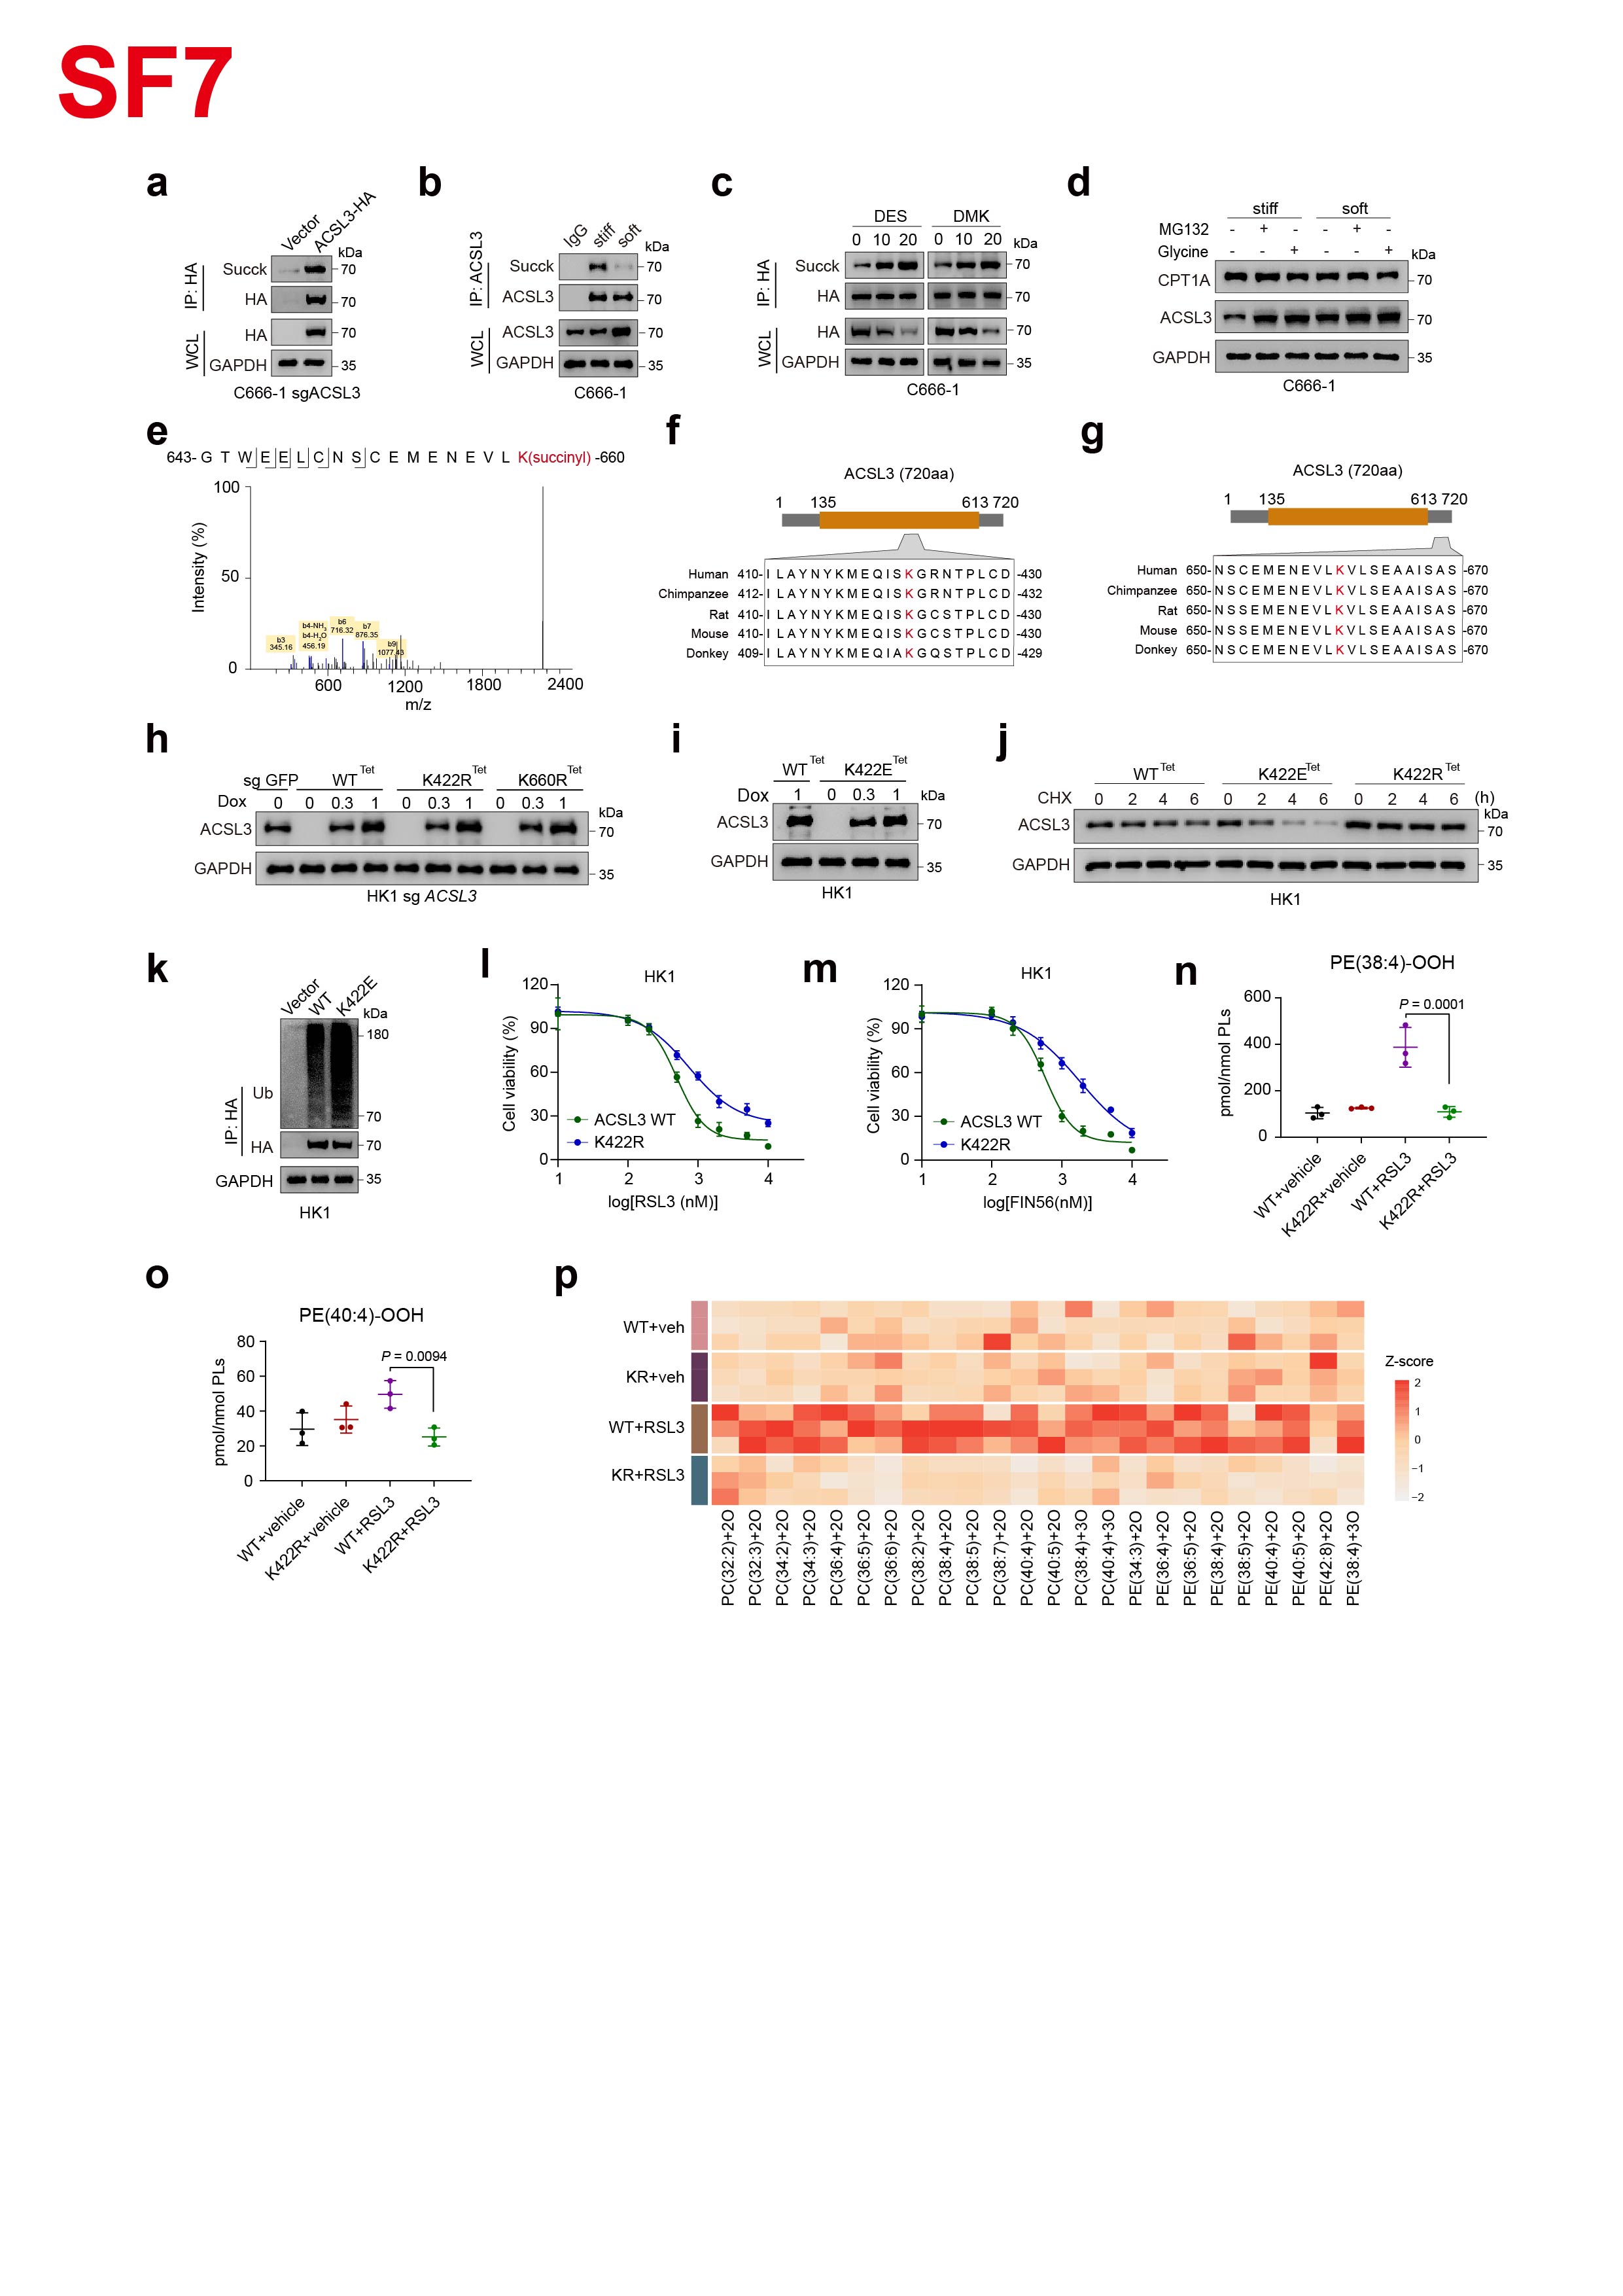


**a**, Immunoprecipitation followed by immunoblotting showing lysine succinylation of ACSL3 in *ACSL3*-knockout C666-1 cells reconstituted with ACSL3-WT.

**b**, Immunoprecipitation followed by immunoblotting showing lysine succinylation of ACSL3 in C666-1 cells cultured on soft or stiff matrices.

**c**, Immunoprecipitation followed by immunoblotting showing lysine succinylation of ACSL3 in re-expressed ACSL3-WT-HA C666-1 cells treated with DES or DMK.

**d**, Immunoblots analysis of ACSL3 and CPT1A in C666-1 cells cultured on soft or stiff matrices and treated with MG132 or glycine.

**e**, Mass spectrometry analysis of the succinylation site in ACSL3 protein purified from HK1 cells.

**f-g**, Alignment of protein sequences surrounding ACSL3 K422 **(f)** and K660 **(g)** across different species.

**h**, Immunoblots analysis confirming doxycycline (Dox)-inducible expression of WTTet (ACSL3-WTTet), K422RTet (ACSL3-K422RTet) and K660RTet (ACSL3-K660RTet) in *ACSL3*-knockout HK1 cells in the absence or presence of Dox.

**i**, Immunoblots analysis confirming Dox-inducible expression of K422E (ACSL3-K422ETet) in *ACSL3*-knockout HK1 cells in the absence or presence of Dox.

**j**, Immunoblots analysis of ACSL3 in ACSL3-WTTet, ACSL3-K422ETet or ACSL3-K422RTet HK1 cells treated with CHX for the indicated times.

**k**, Cell lysates from ACSL3-WTTet, ACSL3-K422ETet or ACSL3-K422RTet HK1 cells were subjected to immunoprecipitation with anti-HA antibody, followed by immunoblotting with Ub antibody.

**l-m**, Dose-dependent cell death induced by the RSL3 **(l)** or FIN56 **(m)** in ACSL3-WTTet or ACSL3-K422RTet HK1 cells.

**n-o**, Levels of the ferroptosis-associated phospholipid species PE (38:4)-OOH **(n)** and PE (40:4)-OOH **(o)** in ACSL3-WTTet or ACSL3-K422RTet HK1 cells treated with vehicle or RSL3.

**p**, Heatmap showing LC-MS analysis of the relative abundance of RSL3-induced oxygenated PC and PE molecular species in ACSL3-WTTet or ACSL3-K422RTet HK1 cells treated with vehicle or RSL3. Row z-scores were calculated from the averaged abundance of each lipid species.

Data are shown as mean ± SD and are representative of at least three independent experiments, one-way ANOVA (n-o).

**Extended Fig.8 Molecular dynamics simulation for ACSL3 K422 succinylation.**


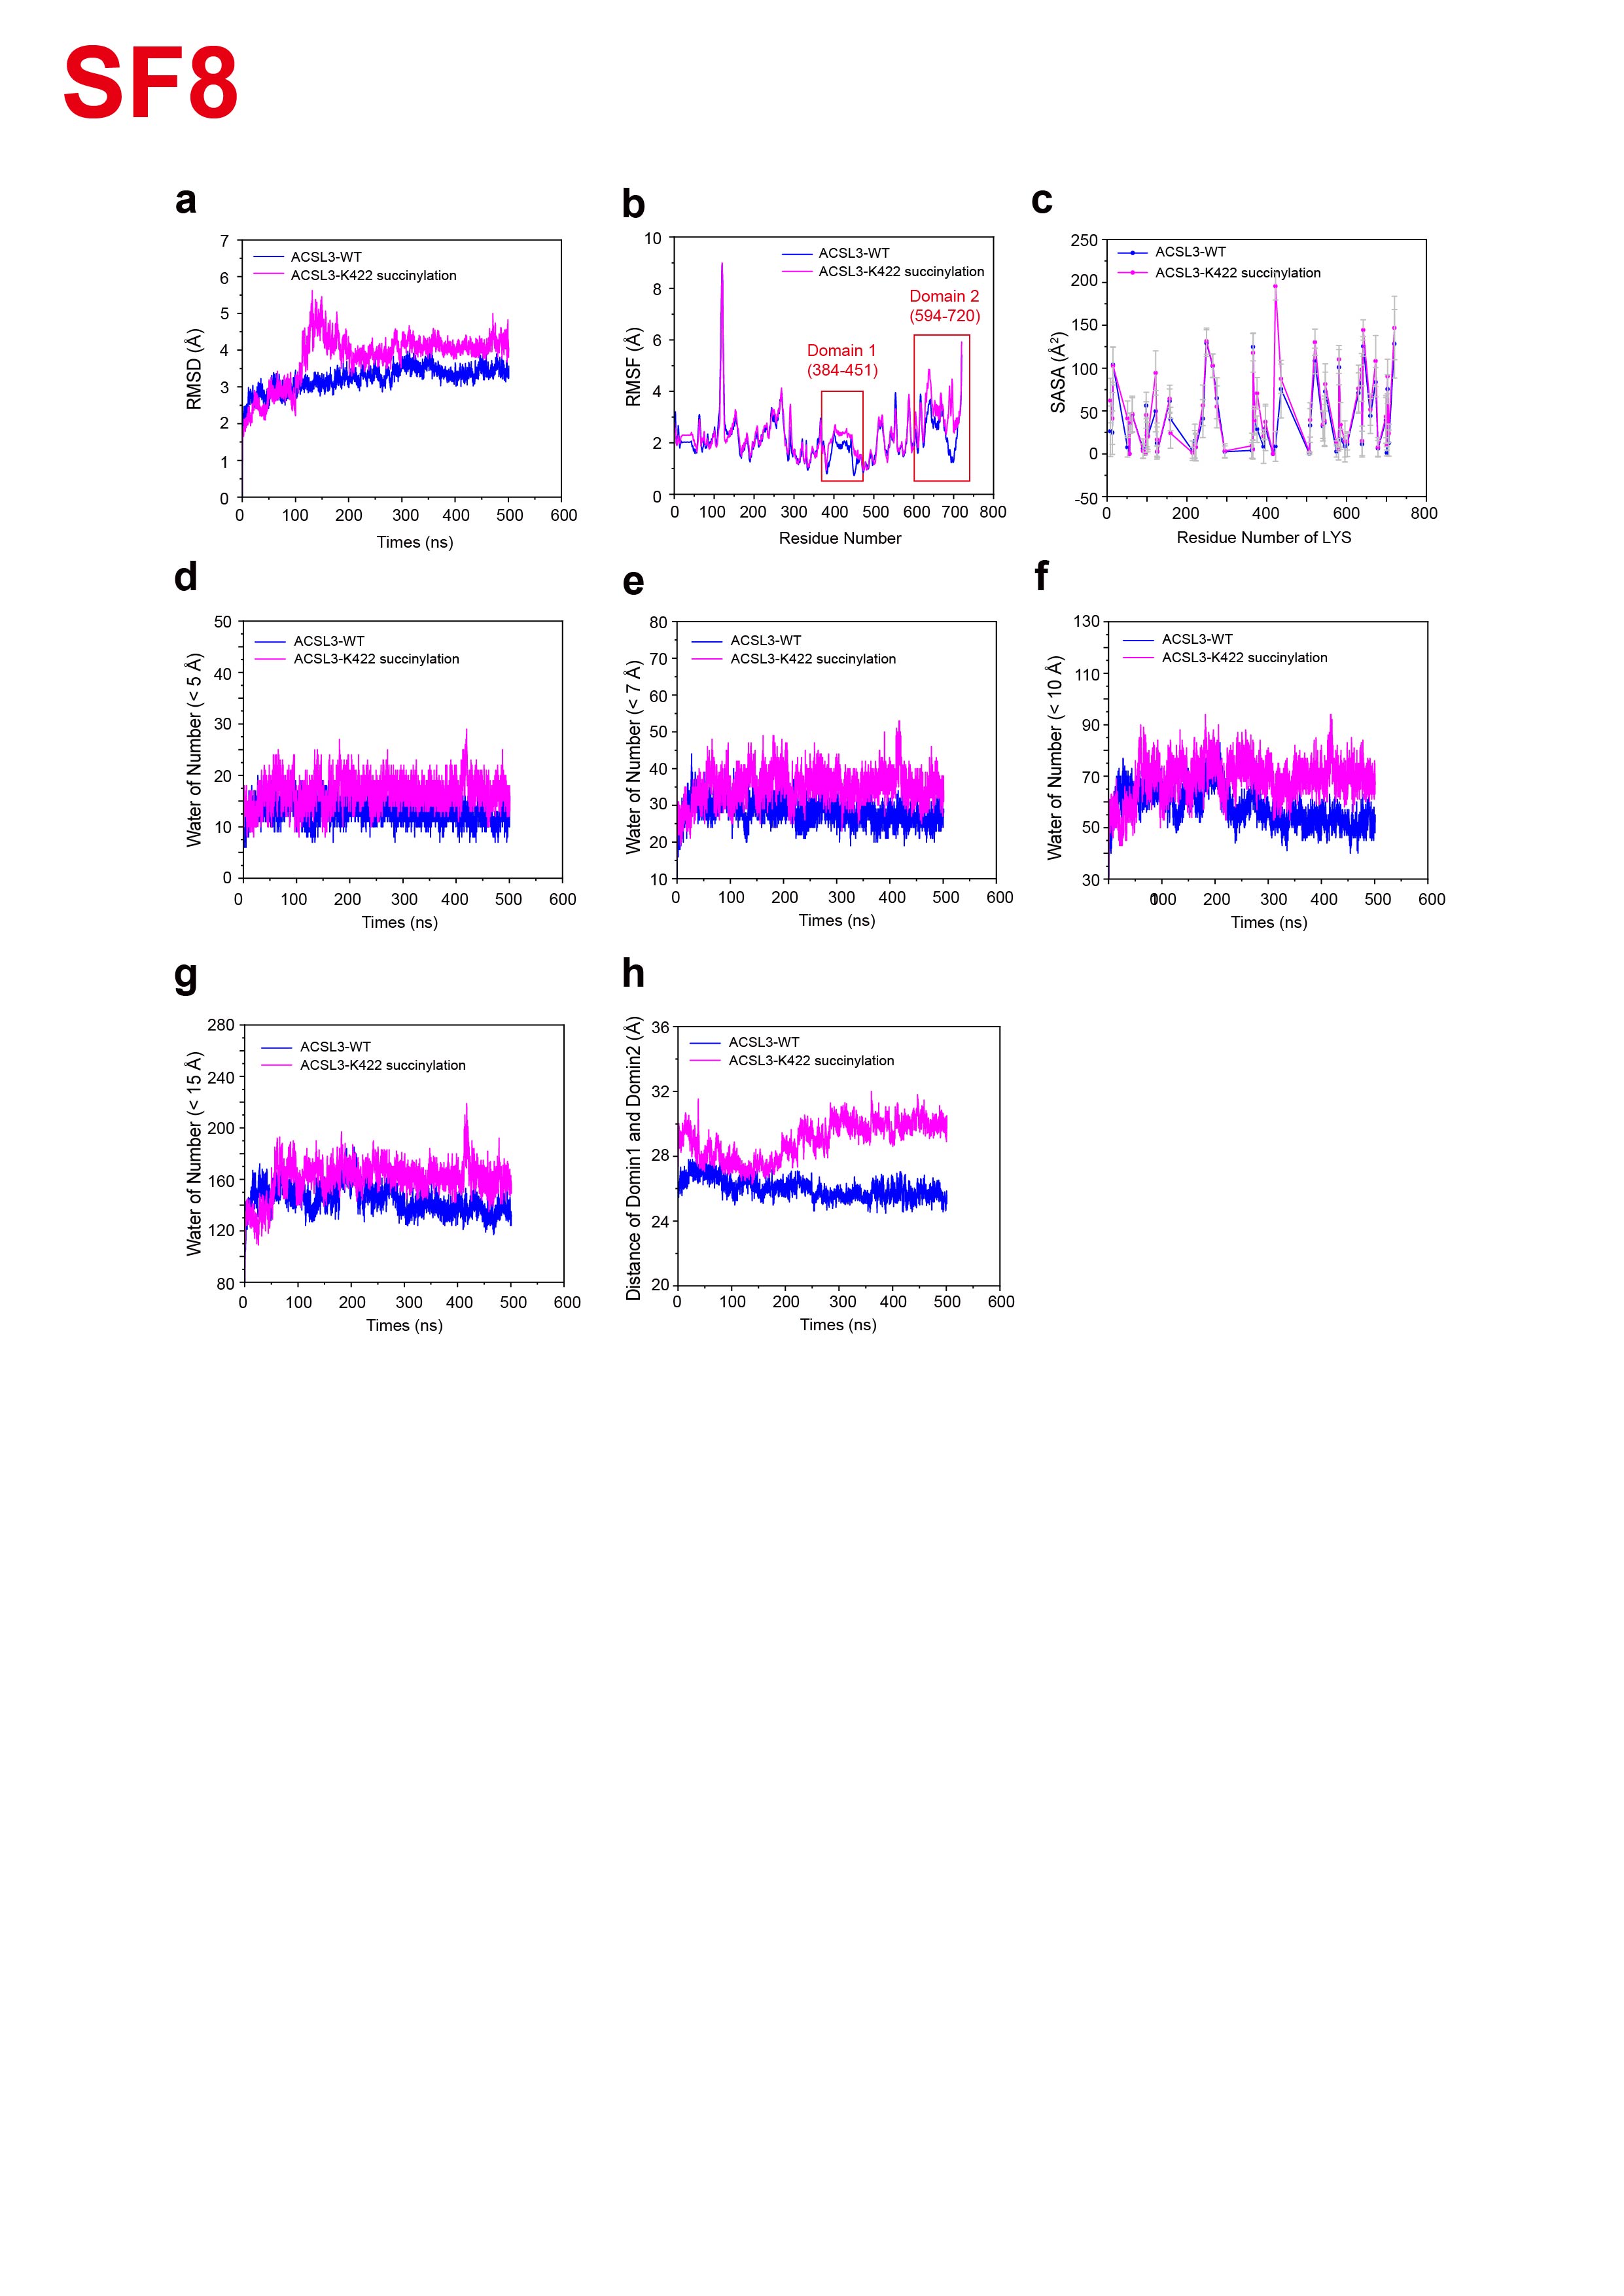


**a**, Root-mean-square deviations (RMSD) of the heavy atoms in ACSL3 protein in ACSL3 WT model and ACSL3 K422succinylation model.

**b**, Root-mean-square fluctuations (RMSF) of each residue in MD simulations in ACSL3 WT model and ACSL3 K422succinylation model.

**c**, Solvent accessible surface area (SASA) of the LYS residues of ACSL3 proteins in ACSL3 WT model and ACSL3 K422succinylation model.

**d-g**, Number of water molecules within 5 Å **(d)**, 7 Å **(e)**, 10 Å **(f)** and 15 Å **(g)** of the centroid of the ACSL3 proteins as a function of the simulation times in ACSL3 WT model and ACSL3 K422succinylation model.

**h**, Distance changes between the centroid of the Domain 1 and the centroid of the Domain 2 in ACSL3 WT model and ACSL3 K422succinylation model.

**Extended Fig.9 CPT1A mediates ACSL3 K422 succinylation and regulates its expression.**


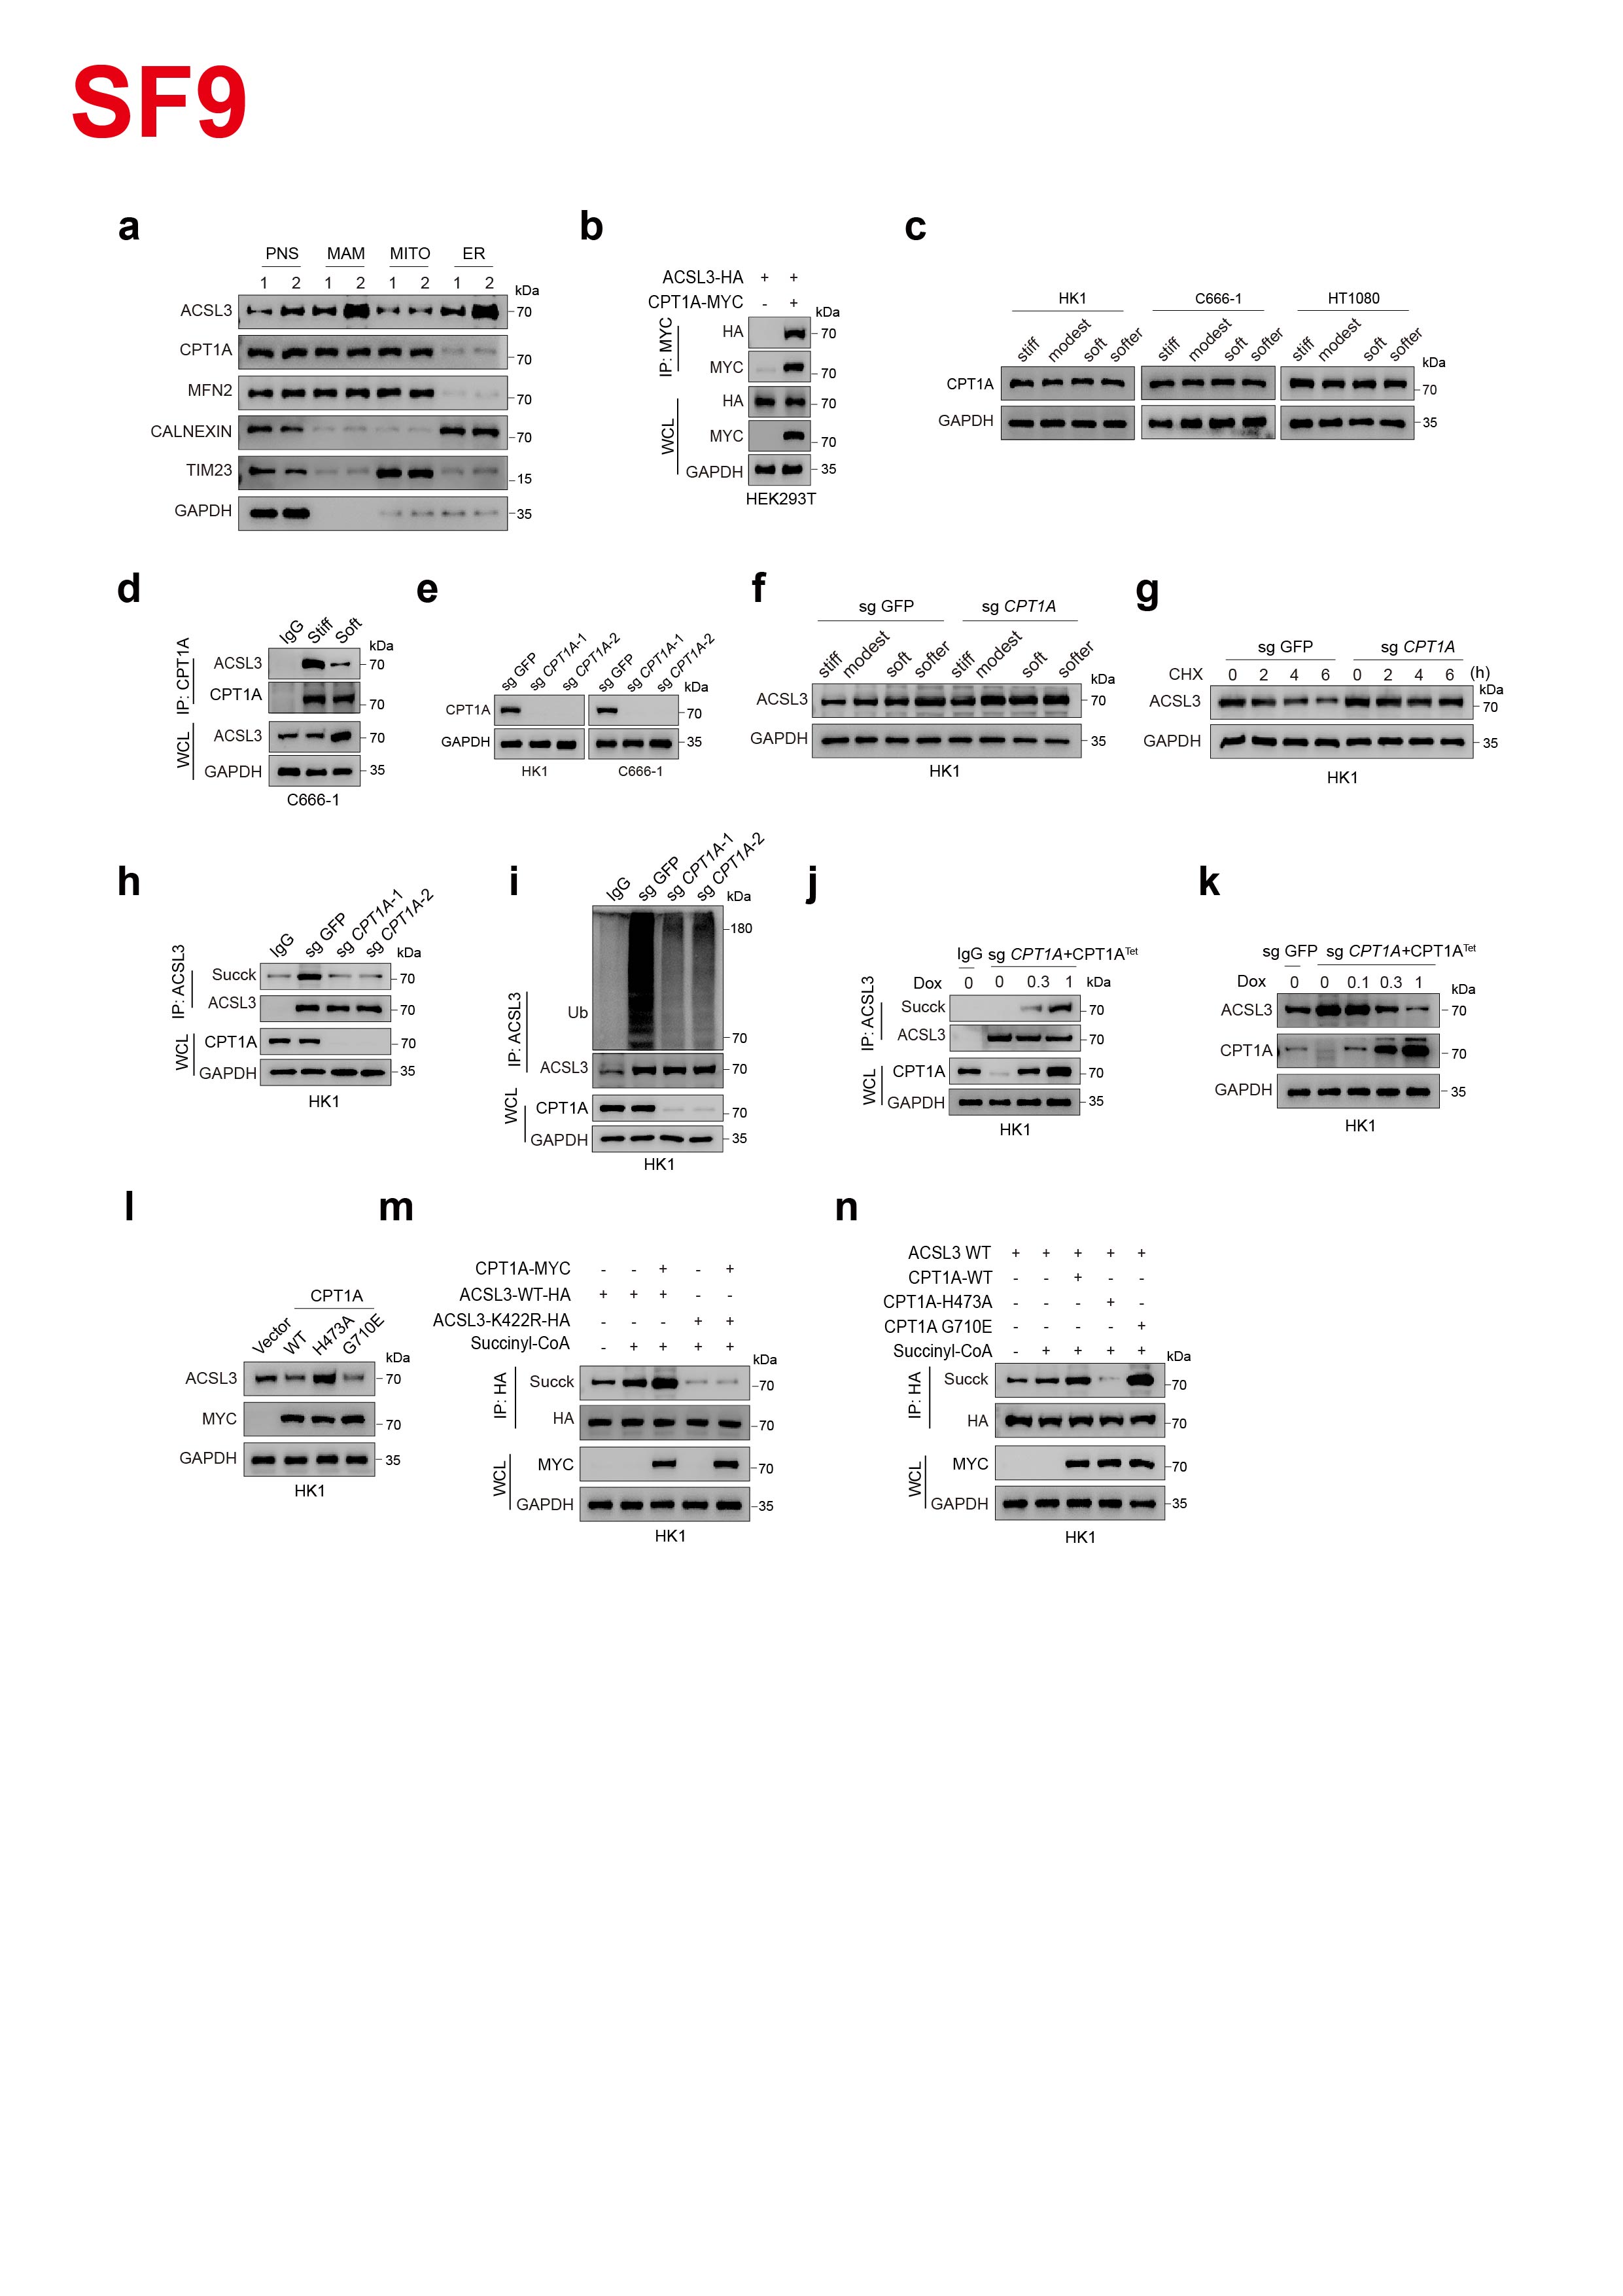


**a**, Immunoblots analysis of ACSL3, CPT1A, MFN2, CALNEXIN and TIM23 in subcellular fractions from HK1 cells. PNS, post-nuclear supernatant; MAM, mitochondria-associated membrane; MITO, mitochondria; ER, endoplasmic reticulum. TIM23, GAPDH, CALNEXIN and MFN2 serve as markers for mitochondria, cytosol, ER and MAM, respectively.

**b**, Immunoprecipitation followed by immunoblotting showing the interaction between CPT1A and ACSL3.

**c**, Immunoblots analysis of CPT1A in HK1, C666-1 and HT1080 cells cultured on matrices of different stiffness.

**d**, Immunoprecipitation followed by immunoblotting showing the interaction between CPT1A and ACSL3 in C666-1 cells cultured on soft or stiff matrices.

**e**, Immunoblots analysis confirming *CPT1A* knockout efficiency in HK1 and C666-1 cells.

**f**, Immunoblots analysis of ACSL3 in parental and *CPT1A*-knockout HK1 cells cultured on matrices of different stiffness.

**g**, Immunoblots analysis of ACSL3 in parental and *CPT1A*-knockout HK1 cells treated with CHX for the indicated times.

**h**, Immunoprecipitation followed by immunoblotting showing lysine succinylation of ACSL3 in *CPT1A*-knockout HK1 cells.

**i**, Cell lysates from parental and *CPT1A*-knockout HK1 cells were subjected to immunoprecipitation with anti-ACSL3 antibody, followed by immunoblotting with Ub antibody.

**j**, Immunoprecipitation followed by immunoblotting showing lysine succinylation of ACSL3 in HK1 cells with Dox-inducible CPT1A expression (CPT1A WTTet) in the absence or presence of Dox.

**k**, Immunoblots analysis of ACSL3 and CPT1A in CPT1A-WTTet HK1 cells in the absence or presence of Dox.

**l**, Immunoblots analysis of ACSL3 in CPT1A-WTTet, CPT1A-H473ATet or CPT1A-G710ETet overexpressing *CPT1A*-knockout HK1 cells.

**m**, Immunoprecipitation followed by immunoblotting showing lysine succinylation of ACSL3-WTTet or ACSL3-K422RTet HK1 cells in the absence or presence of CPT1A overexpression.

**n**, Immunoprecipitation followed by immunoblotting showing lysine succinylation of ACSL3 in CPT1A-WTTet, CPT1A-H473ATet or CPT1A-G710ETet overexpressing HK1 cells.

Data are representative of at least three independent experiments.
