# Supplementary material
Source: Research Square preprint supplement (doi:10.21203/rs.3.rs-9481973/v1)
Supplement: Supplementary file 2 [file 3cbf6c730685376a1f4f8db4.docx]

| **Supplementary Table 1.** Primer sequences for qPT-PCR, siRNA and sgRNA assays. | | |
| --- | --- | --- |
| **Name** | **Forward** | **Reverse** |
| Primer sequences for qRT-PCR | | |
| Human GAPDH | 5’-TGATGACATCAAGAAGGTGG-3’ | 5’-TTGTCATACCAGGAAATGAGC-3’ |
| Human Rab10 | 5’-CTGCTCCTGATCGGGGATTC-3’ | 5’-TGATGGTGTGAAATCGCTCCT-3’ |
| Human RTN4 | 5’-GTTGACCTCCTGTACTGGAGA-3’ | 5’-CTGTTACGCTCACAATGCTGA-3’ |
| Human ATAT1 | 5’-GGAGACATCAAGCCATACTCCT-3’ | 5’-CCTCGTTCTGGTGAGTTTCCC-3’ |
| Human SLC25A10 | 5’-GCAGACTTGGTCAACGTCAGGA-3’ | 5’-CATGGTTGCACCCGAGAACAGT-3’ |
| Human SLC13A3 | 5’-CATTGAGGAGTGGAACCTGCA-3’ | 5’-GTGTTGCTCAGCCACATGGACA-3’ |
| Human SLC16A1 | 5’-TTGTTGGTGGCTGCTTGTCAGG-3’ | 5’-TCATGGTCAGAGCTGGATTCAAG-3’ |
| Primer sequences for siRNA | | |
| Human Rab10-1 | 5’-GCCUUCAAUACUACCUUUATT-3’ | 5’-UAAAGGUAGUAUUGAAGGCTT-3’ |
| Human Rab10-2 | 5’-CCUACUACAGAGGCGCAAUTT-3’ | 5’-AUUGCGCCUCUGUAGUAGGTT-3’ |
| Human RTN4-1 | 5’-CCUGUACUGGAGAGACAUUTT-3’ | 5’-AAUGUCUCUCCAGUACAGGTT-3’ |
| Human RTN4-2 | 5’-GGCACAGAUAGAUCAUUAUTT-3’ | 5’-AUAAUGAUCUAUCUGUGCCTT-3’ |
| Human ATAT1-1 | 5’-GGAGUGUGCCACCUUGAAATT-3’ | 5’-UUUCAAGGUGGCACACUCCTT-3’ |
| Human ATAT1-2 | 5’-GGCUCAUAAUGAGGUAGAATT-3’ | 5’-UUCUACCUCAUUAUGAGCCTT-3’ |
| Primer sequences for sgRNA | | |
| Human ACSL3-1 | 5’-CACCGTAGATGGTTTTGAAGACACG-3’ | 5’-AAACCGTGTCTTCAAAACCATCTAC-3’ |
| Human ACSL3-2 | 5’-CACCGTGATTTTTCTTGTCTTGACT-3’ | 5’-AAACAGTCAAGACAAGAAAAATCAC-3’ |
| Human ACSL3-3 | 5’-CACCGGTATAAAATATAAAAGAATA-3’ | 5’-AAACTATTCTTTTATATTTTATACC-3’ |
| Human CPT1A-1 | 5’-CACCGGGCAGAAGCTCACCAAGCTG-3’ | 5’-AAACCAGCTTGGTGAGCTTCTGCCC-3’ |
| Human CPT1A-2 | 5’-CACCGCTCCGGACGGGATTGACCTG-3’ | 5’-AAACCAGGTCAATCCCGTCCGGAGC-3’ |
| Human CPT1A-3 | 5’-CACCGCTTAGACAAATCTATCTCTC-3’ | 5’-AAACGAGAGATAGATTTGTCTAAGC-3’ |
