# Supplementary material
Source: Research Square preprint supplement (doi:10.21203/rs.3.rs-9481973/v1)
Supplement: Supplementary file 4 [file 8ad4abd592cdfe491781053a.docx]

| **Characteristic** | **No. of patients with nrNPC (%)** | **No. of patients with rNPC (%)** |
| --- | --- | --- |
| **Age** | 105 | 104 |
| ≤45 years | 47(44.8%) | 25(24.0%) |
| >45 years | 58(55.2%) | 79(76.0%) |
| **Sex** |  |  |
| Male | 86(81.9%) | 88(84.6%) |
| Female | 19(18.1%) | 16(15.4%) |
| **WHO type** |  |  |
| II | 3(2.9%) | 3(2.9%) |
| III | 102(97.1%) | 101(97.1%) |
| **T stage** |  |  |
| T1-2 | 14(13.3%) | 18(17.3%) |
| T3-4 | 91(86.7%) | 86(82.7%) |
| **N stage** |  |  |
| N0-1 | 35(33.3%) | 46(44.2%) |
| N2-3 | 70(66.7%) | 58(55.8%) |
| **M stage** |  |  |
| M0 | 95(90.5%) | 101(97.1%) |
| M1 | 10(9.5%) | 3(2.9%) |

**Supplementary Table 3.** Clinical features in patients with locoregionally advanced nasopharyngeal carcinoma. Related to Figure 6.
