# Supplementary material
Source: Research Square preprint supplement (doi:10.21203/rs.3.rs-9481973/v1)
Supplement: Supplementary file 5 [file d0de3390d99f8b35ce502183.docx]

| **Antibodies for WB** | **SOURCE** | **IDENTIFIER** |
| --- | --- | --- |
| **Normal mouse IgG** | Cell Signaling Technology | 7076S |
| **normal rabbit IgG** | Cell Signaling Technology | 7074S |
| **ACSL4** | Abcam | ab155282 |
| **ACSL3** | Cell Signaling Technology | 83319 |
| **LPCAT3** | Abcam | ab239585 |
| **LPCAT1** | Cell Signaling Technology | 57411 |
| **iPLA2B** | Santa Cruz | sc-376563 |
| **Ubiquitin** | Cell Signaling Technology | 43124S |
| **FASN** | Cell Signaling Technology | 3180 |
| **GPX4** | Abcam | ab125066 |
| **SLC7A11** | Cell Signaling Technology | 12691 |
| **FSP1** | Santa Cruz | sc-377120 |
| **DHODH** | Cell Signaling Technology | 26381 |
| **ALOX15** | Cell Signaling Technology | 82129 |
| **FTH** | Cell Signaling Technology | 3998 |
| **GCH-1** | Cell Signaling Technology | 36788 |
| **GFP** | Cell Signaling Technology | 2555 |
| **mCherry** | Cell Signaling Technology | 43590 |
| **Tubulin** | Cell Signaling Technology | 2144 |
| **ac-Tubulin** | Cell Signaling Technology | 5335 |
| **VDAC1** | Cell Signaling Technology | 4866 |
| **SUCLA2** | Thermo Fisher Scientific | PA5-58787 |
| **SUCLG1** | Thermo Fisher Scientific | PA5-57766 |
| **SUCLG2** | Thermo Fisher Scientific | PA5-61289 |
| **OGDH** | Cell Signaling Technology | 26865 |
| **SDHA** | Cell Signaling Technology | 11998 |
| **SDHB** | Cell Signaling Technology | 92649 |
| **Succinyllysine** | PTM Biolabs Inc. | PTM-419 |
| **CPT1A** | Cell Signaling Technology | 12252 |
| **MFN2** | Cell Signaling Technology | 9482 |
| **Calnexin** | Cell Signaling Technology | 2433 |
| **TIM23** | Cell Signaling Technology | 34822 |
| **Pierce anti-c-myc magnetic agarose** | Thermo Fisher Scientific | 88842 |
| **pierce anti-HA magnetic Agarose** | Thermo Fisher Scientific | 88836 |
| **Pierce Protein A/G Magnetic Beads** | Thermo Fisher Scientific | 88803 |
| **Antibodies for IF** | **SOURCE** | **IDENTIFIER** |
| **CK** | ORIGENE | ZM-0067 |
| **Collagen I** | Abcam | ab138492 |
| **Antibodies for IHC** | **SOURCE** | **IDENTIFIER** |
| **ACSL3** | Proteintech | ZM-0067 |
