# Supplementary material
Source: Research Square preprint supplement (doi:10.21203/rs.3.rs-9481973/v1)

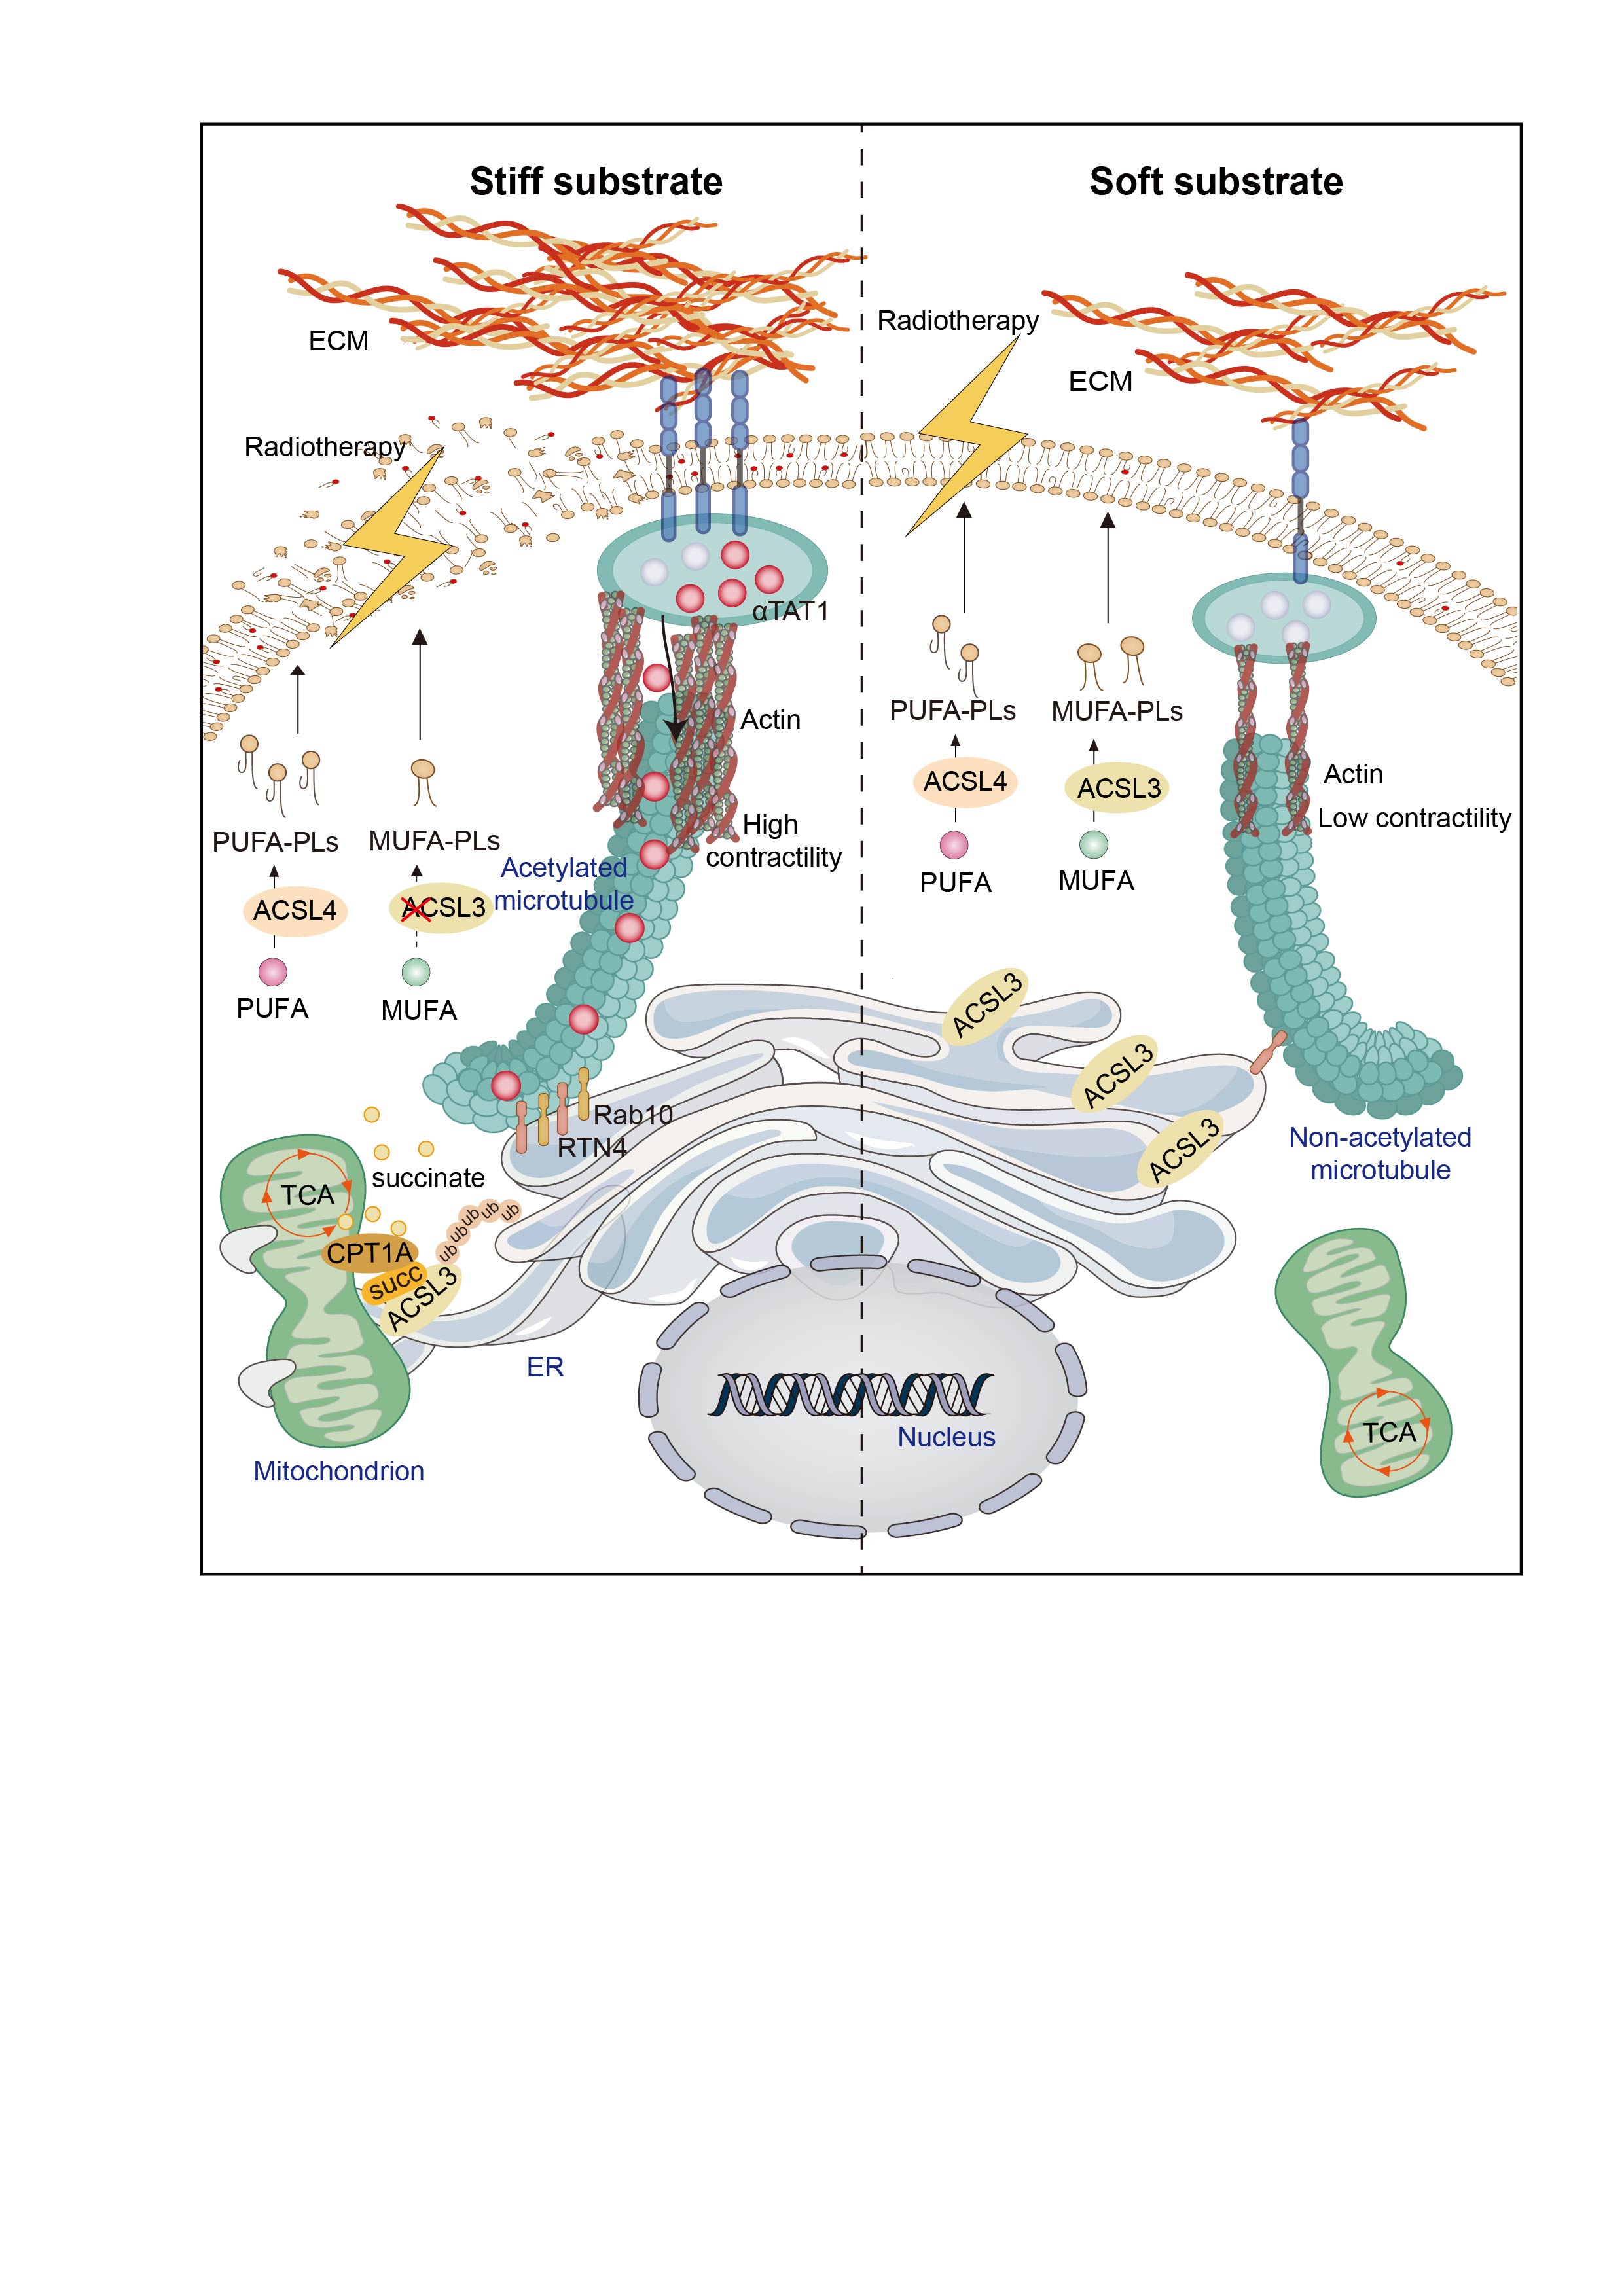
**Graphical abstract**

Supplement: Supplementary file 3 [file 82b2334001d031605feff49a.docx]
